# Supplementary material for: Aluminum complexes with bidentate amido ligands: synthesis, structure and performance on ligand-initiated ring-opening polymerization of rac-lactide
Source: Royal Society of Chemistry journal article supplement (doi:10.1039/c4dt00353e), 2014-01-01
Supplement: c4dt00353e1.pdf [file c4dt00353e1.pdf]

Supporting Information

**Aluminum Complexes with Bidentate Amido Ligands:  
Synthesis, Structure and Performance on  
Ligand-Initiated Ring-Opening Polymerization of  
*rac*-Lactide**

Junpeng Liu and Haiyan Ma\*

Shanghai Key Laboratory of Functional Materials Chemistry and Laboratory of Organometallic  
Chemistry, East China University of Science and Technology, Shanghai 200237, P. R. China.

\* Email: [haiyanma@ecust.edu.cn](mailto:haiyanma@ecust.edu.cn); Tel. 021-64253519

## 1. X-ray diffraction data of complexes 2b and 3b.

**Table S1. The crystal data and structure refinement for complexes 2b and 3b.**

|                                                     | <b>2b</b>                                                        | <b>3b</b>                                                       |
|-----------------------------------------------------|------------------------------------------------------------------|-----------------------------------------------------------------|
| Formula                                             | C <sub>23</sub> H <sub>35</sub> AlN <sub>2</sub>                 | C <sub>22</sub> H <sub>31</sub> AlN <sub>2</sub>                |
| Formula weight                                      | 366.51                                                           | 350.47                                                          |
| Temperature (K)                                     | 293(2)                                                           | 293(2)                                                          |
| Crystal system                                      | Monoclinic                                                       | Orthorhombic                                                    |
| Space group                                         | P 21/c                                                           | P 21 21 21                                                      |
| <i>a</i> (Å)                                        | 10.075(3)                                                        | 7.880(3)                                                        |
| <i>b</i> (Å)                                        | 17.439(6)                                                        | 13.970(5)                                                       |
| <i>c</i> (Å)                                        | 13.495(5)                                                        | 18.482(7)                                                       |
| $\alpha$ (°)                                        | 90                                                               | 90                                                              |
| $\beta$ (°)                                         | 105.666(4)                                                       | 90                                                              |
| $\gamma$ (°)                                        | 90                                                               | 90                                                              |
| <i>V</i> (Å <sup>3</sup> )                          | 2283.0(13)                                                       | 2034.5(14)                                                      |
| <i>Z</i>                                            | 4                                                                | 4                                                               |
| Density (g·cm <sup>-3</sup> )                       | 1.066                                                            | 1.144                                                           |
| Absorp coeff/mm <sup>-1</sup>                       | 0.097                                                            | 0.106                                                           |
| <i>F</i> (000)                                      | 800                                                              | 760                                                             |
| Data collected (hkl)                                | -12 ≤ <i>h</i> ≤ 12, -21 ≤ <i>k</i> ≤ 11,<br>-16 ≤ <i>l</i> ≤ 16 | -9 ≤ <i>h</i> ≤ 10, -16 ≤ <i>k</i> ≤ 17,<br>-22 ≤ <i>l</i> ≤ 23 |
| $\theta$ range for data collection/°                | 1.954 to 26.010                                                  | 1.827 to 27.010                                                 |
| Max. and min. transmission                          | 1 and 0.753                                                      | 1 and 0.507                                                     |
| Data/restraints/parameters                          | 4494 / 0 / 239                                                   | 4339 / 0 / 230                                                  |
| Goodness-of-fit on <i>F</i> <sup>2</sup>            | 0.902                                                            | 0.936                                                           |
| Final <i>R</i> indices [ <i>I</i> > 2σ( <i>I</i> )] | <i>R</i> 1 = 0.0453, <i>wR</i> 2 = 0.1140                        | <i>R</i> 1 = 0.0389, <i>wR</i> 2 = 0.0919                       |
| <i>R</i> indices (all data)                         | <i>R</i> 1 = 0.0898, <i>wR</i> 2 = 0.1287                        | <i>R</i> 1 = 0.0518, <i>wR</i> 2 = 0.0972                       |
| Largest diff. peak and hole/e Å <sup>-3</sup>       | 0.261 and -0.192                                                 | 0.163 and -0.166                                                |

2.  $^1\text{H}$  NMR and  $^{13}\text{C}$  NMR spectra of proligands 1a-1j and aluminum complexes 2b, 2d, 3a-3j.

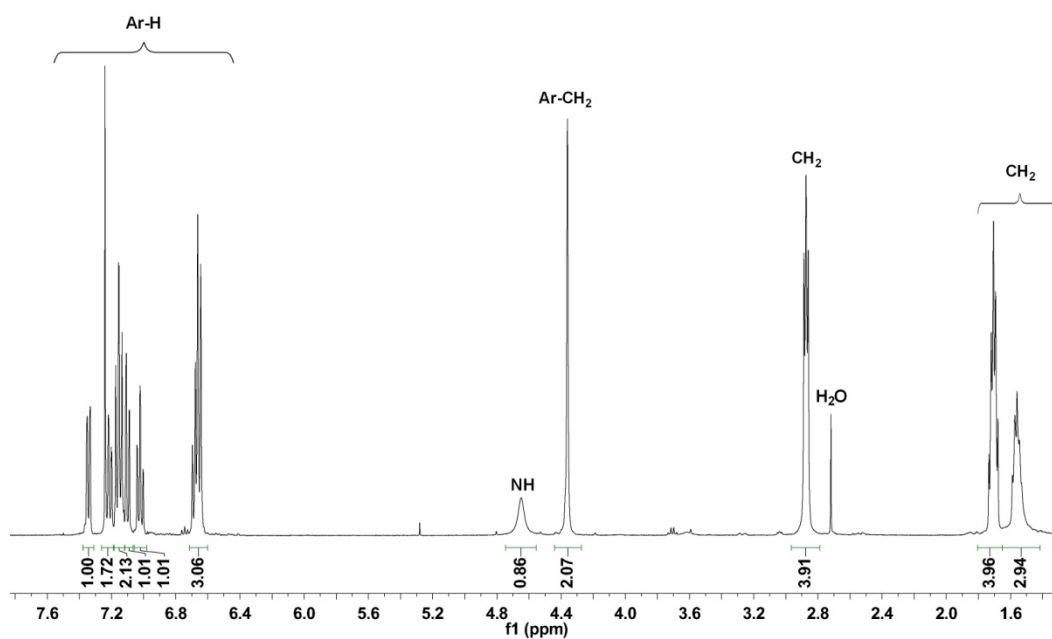

Figure S1. The  $^1\text{H}$  NMR spectrum of compound **1a** ( $\text{CDCl}_3$ , 400 MHz).

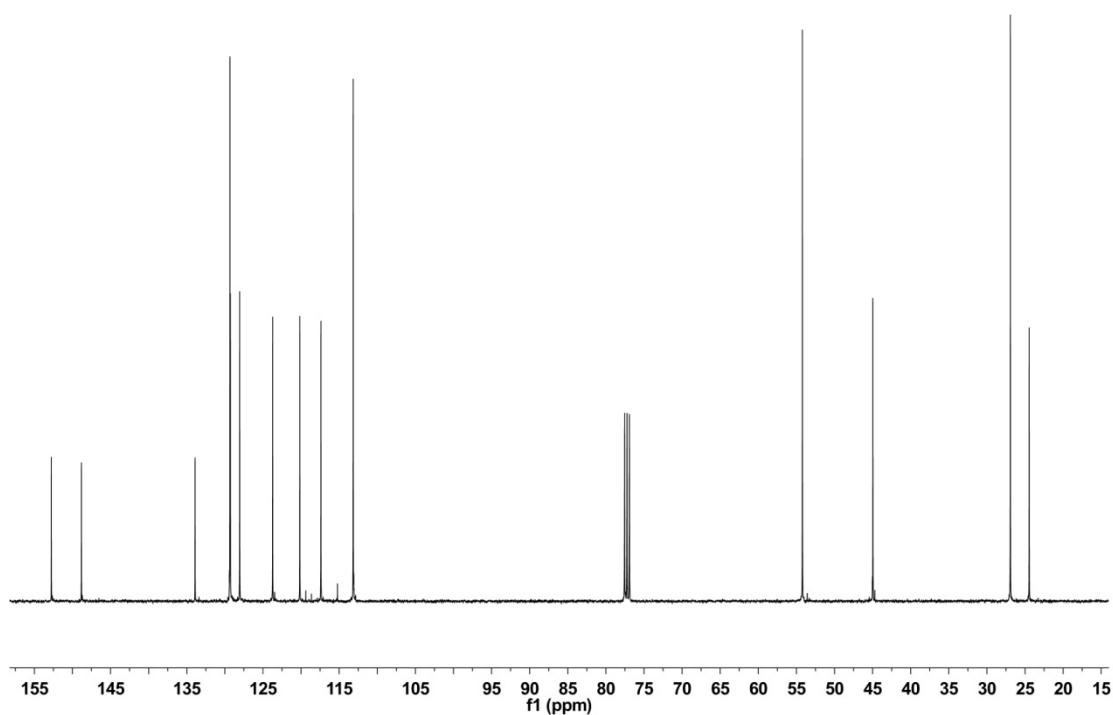

Figure S2. The  $^{13}\text{C}$  NMR spectrum of compound **1a** ( $\text{CDCl}_3$ , 100 MHz).

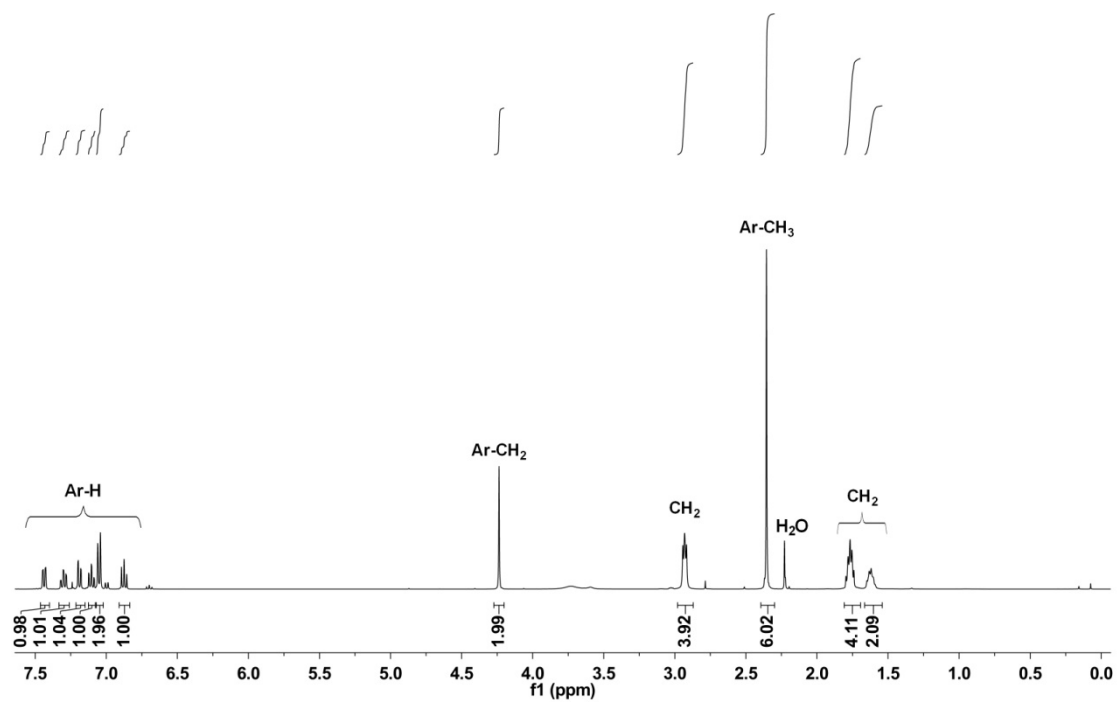

**Figure S3.** The  $^1\text{H}$  NMR spectrum of compound **1b** ( $\text{CDCl}_3$ , 400 MHz).

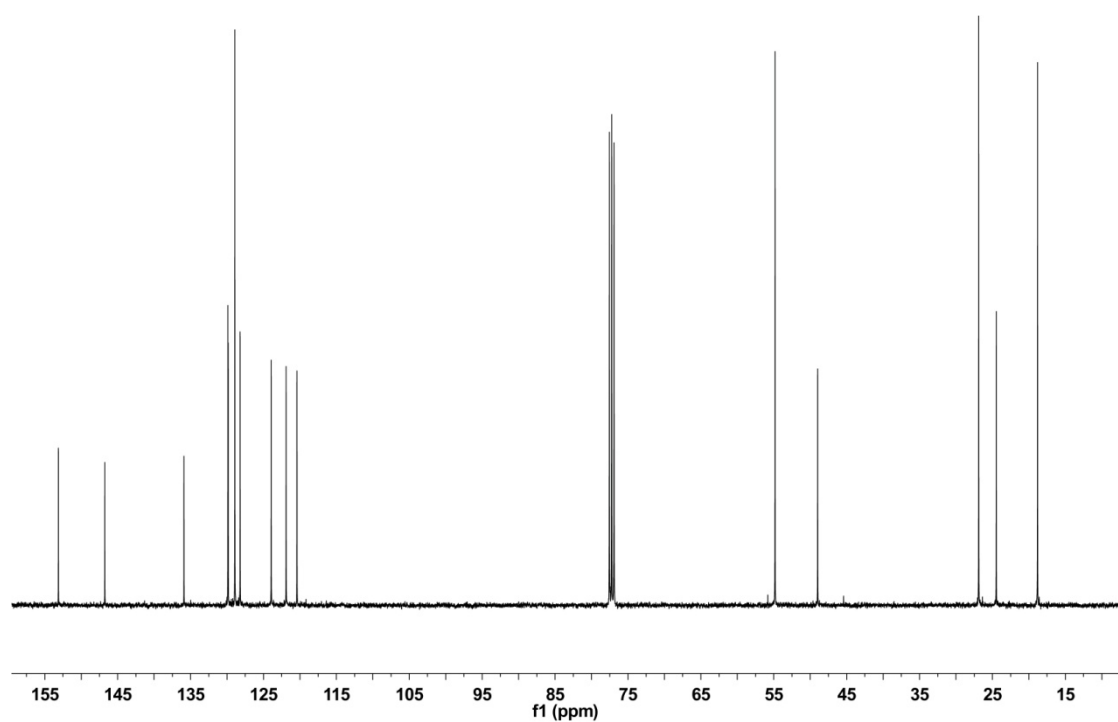

**Figure S4.** The  $^{13}\text{C}$  NMR spectrum of compound **1b** ( $\text{CDCl}_3$ , 100 MHz).

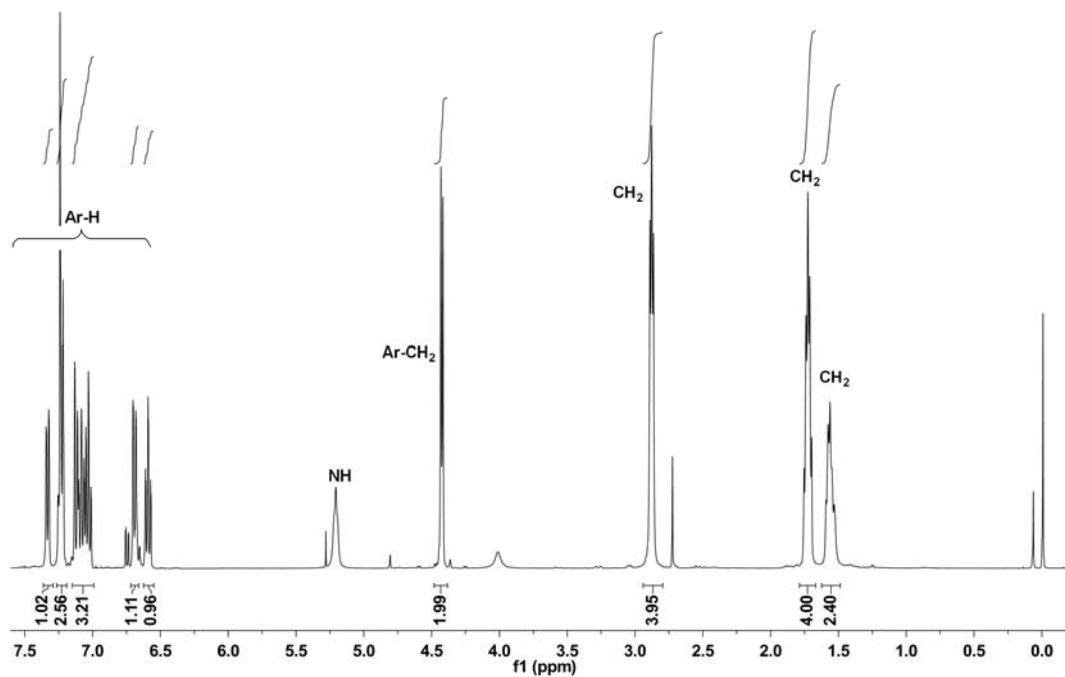

**Figure S5.** The  $^1\text{H}$  NMR spectrum of compound **1c** ( $\text{CDCl}_3$ , 400 MHz).

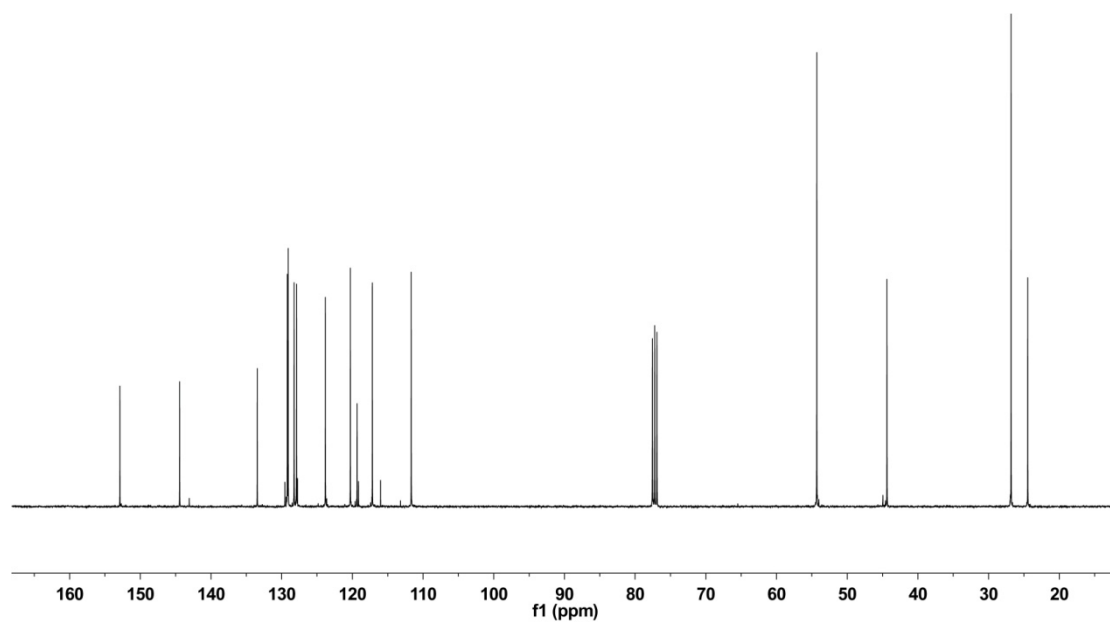

**Figure S6.** The  $^{13}\text{C}$  NMR spectrum of compound **1c** ( $\text{CDCl}_3$ , 100 MHz).

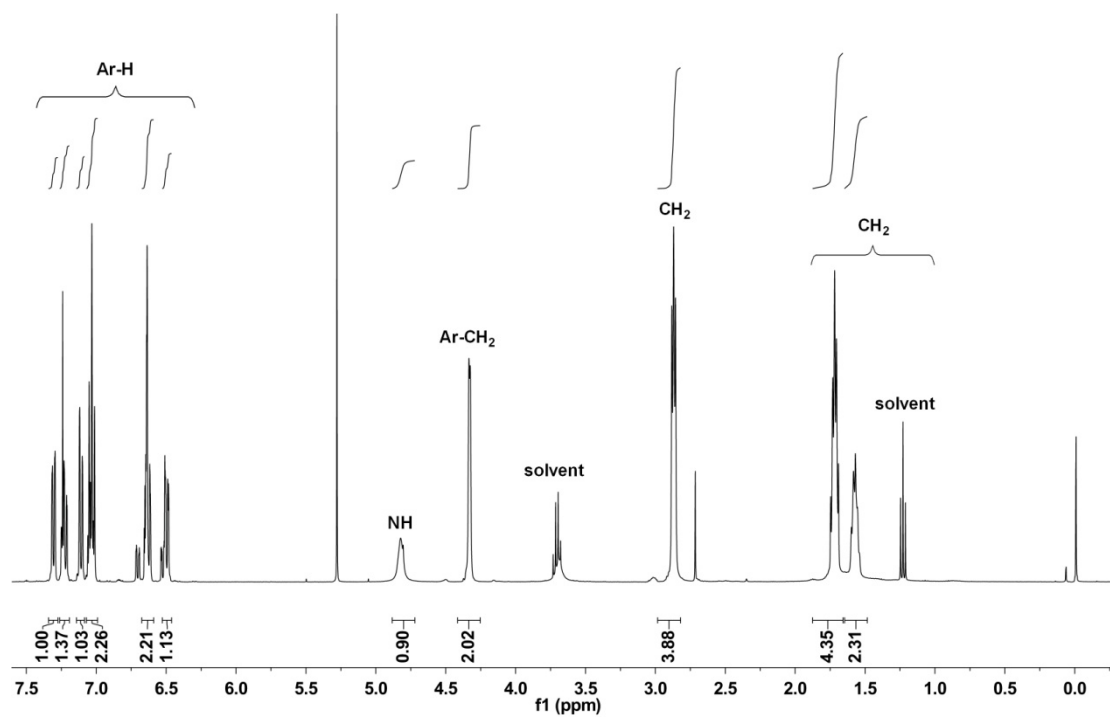

**Figure S7.** The  $^1\text{H}$  NMR spectrum of compound **1d** ( $\text{CDCl}_3$ , 400 MHz).

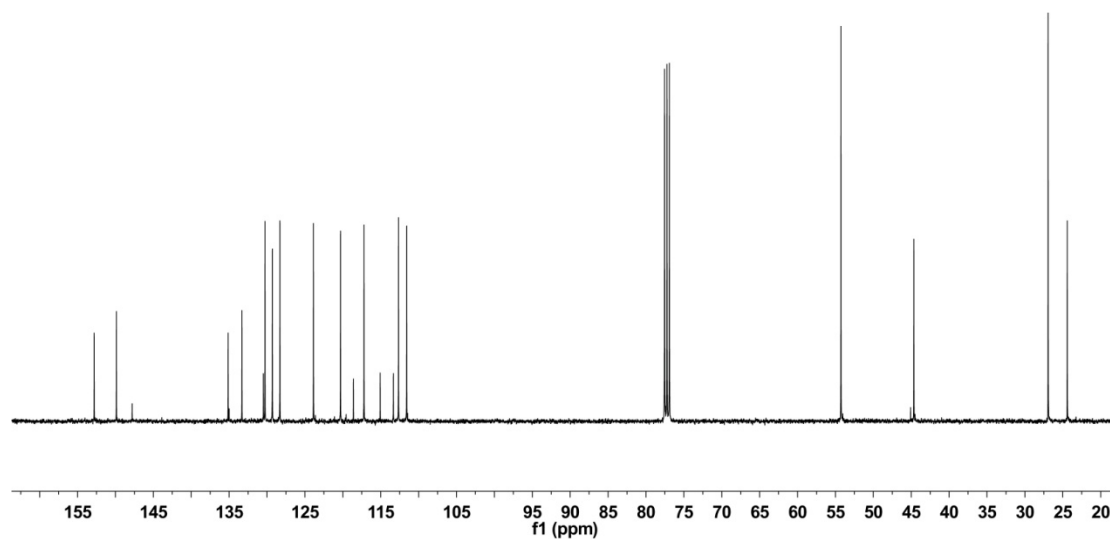

**Figure S8.** The  $^{13}\text{C}$  NMR spectrum of compound **1d** ( $\text{CDCl}_3$ , 100 MHz).

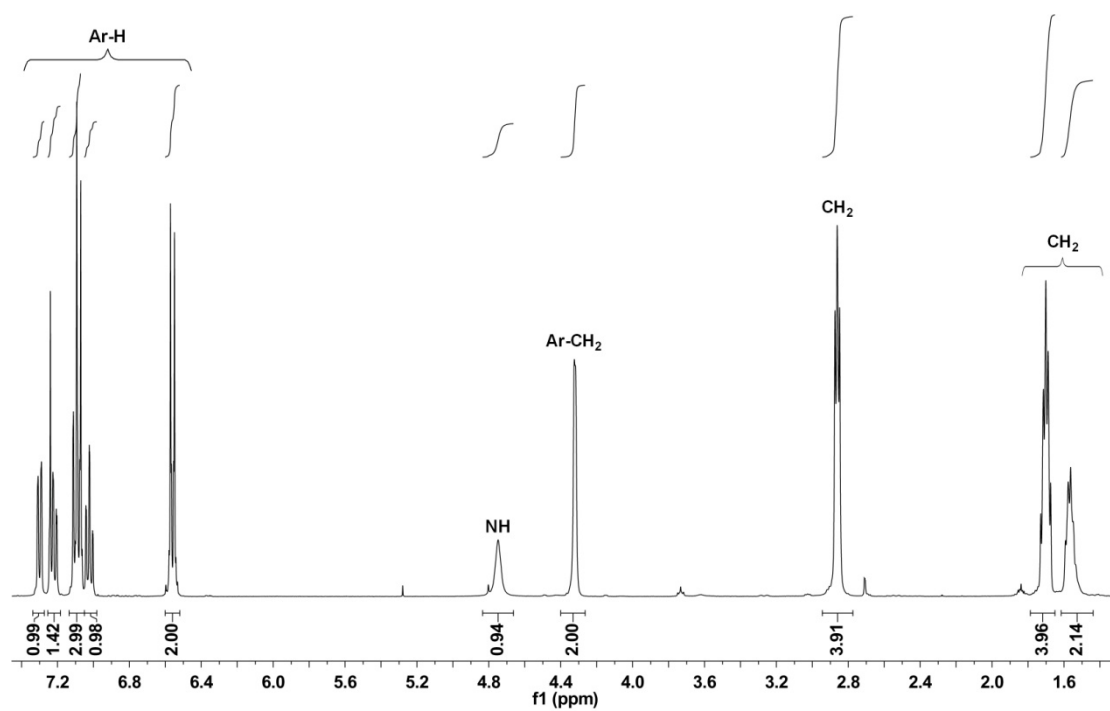

**Figure S9.** The  $^1\text{H}$  NMR spectrum of compound **1e** ( $\text{CDCl}_3$ , 400 MHz).

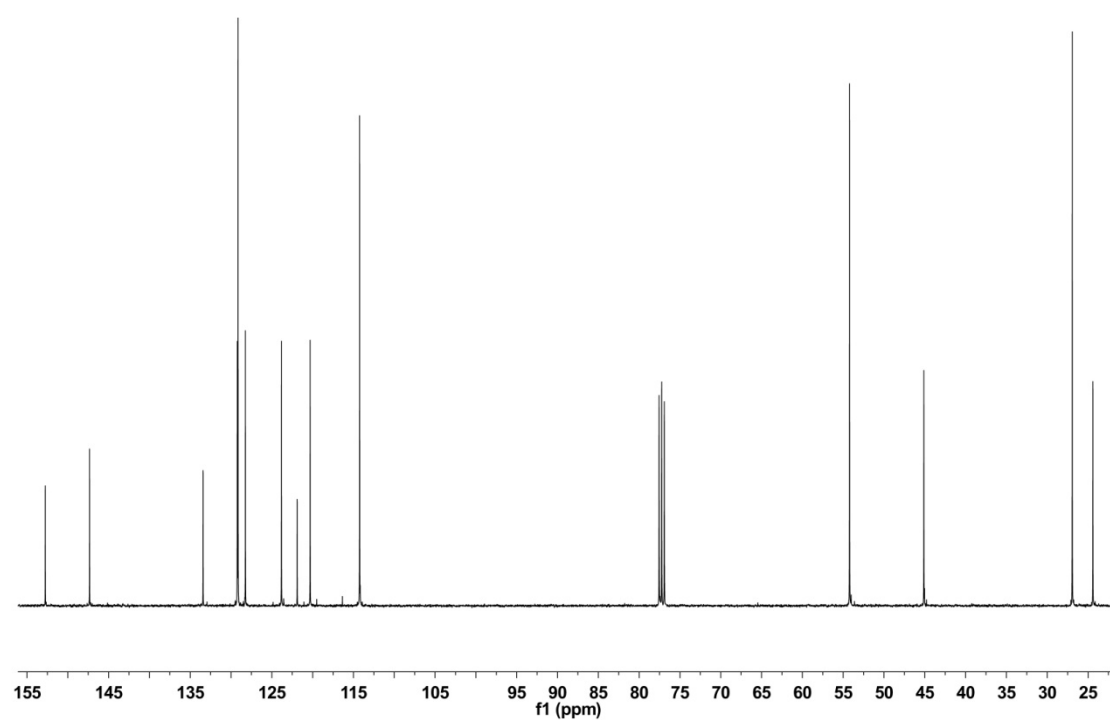

**Figure S10.** The  $^{13}\text{C}$  NMR spectrum of compound **1e** ( $\text{CDCl}_3$ , 100 MHz).

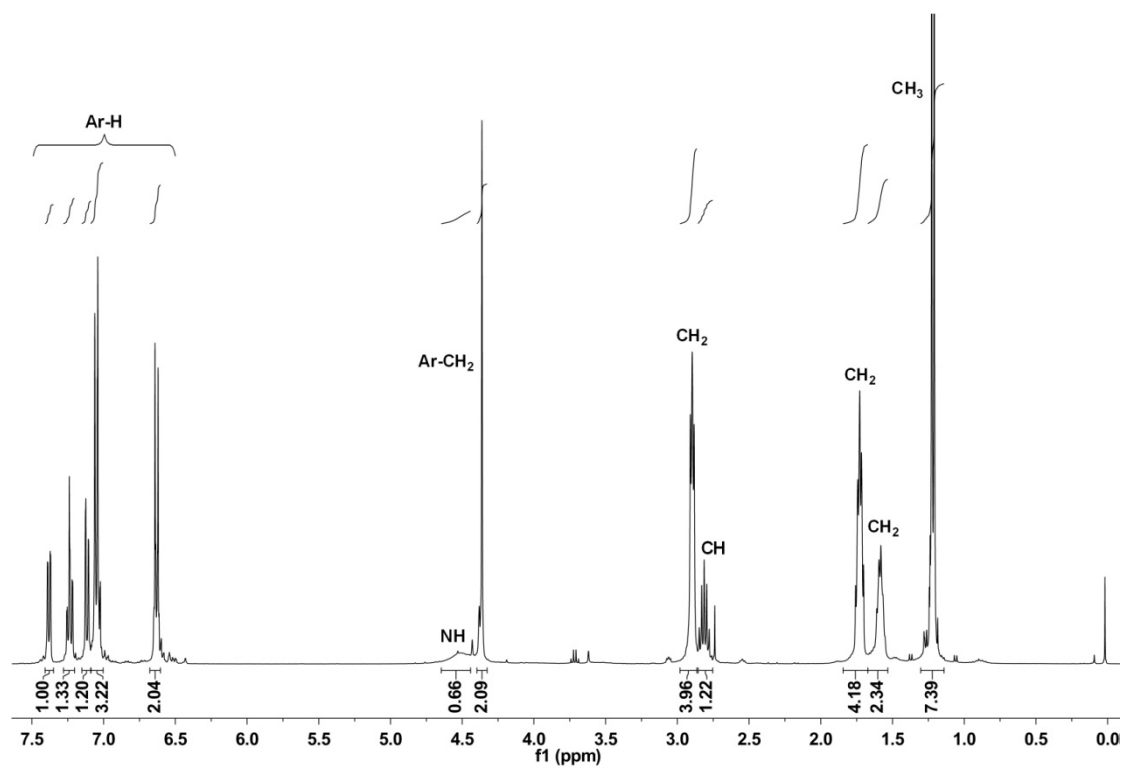

**Figure S11.** The  $^1\text{H}$  NMR spectrum of compound **1f** ( $\text{CDCl}_3$ , 400 MHz).

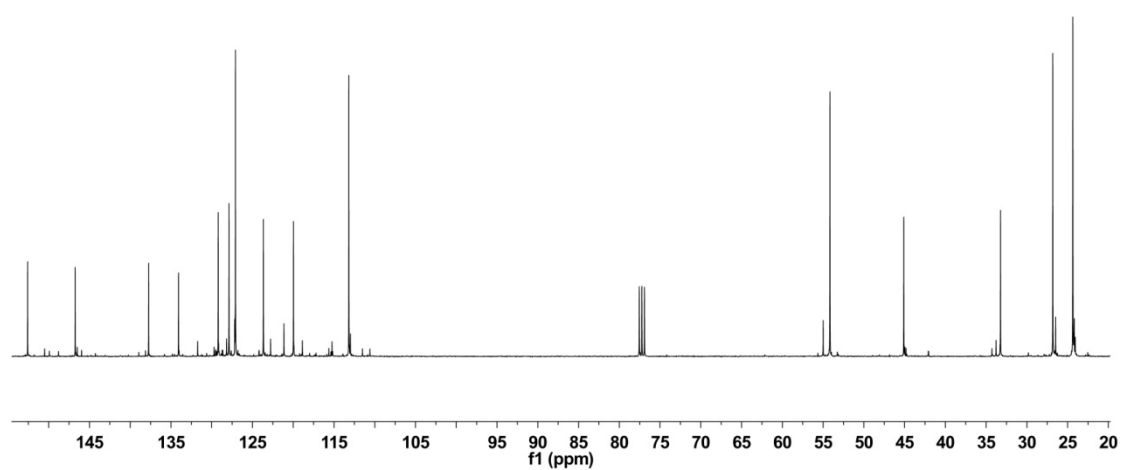

**Figure S12.** The  $^{13}\text{C}$  NMR spectrum of compound **1f** ( $\text{CDCl}_3$ , 100 MHz).



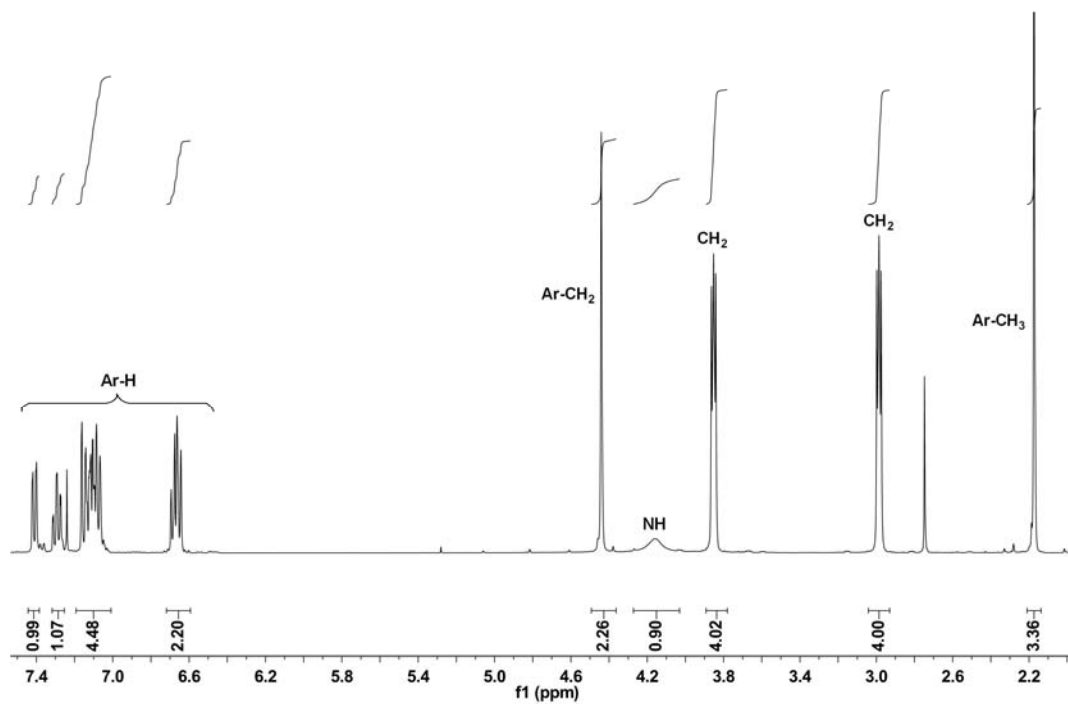

**Figure S13.** The  $^1\text{H}$  NMR spectrum of compound **1g** ( $\text{CDCl}_3$ , 400 MHz).

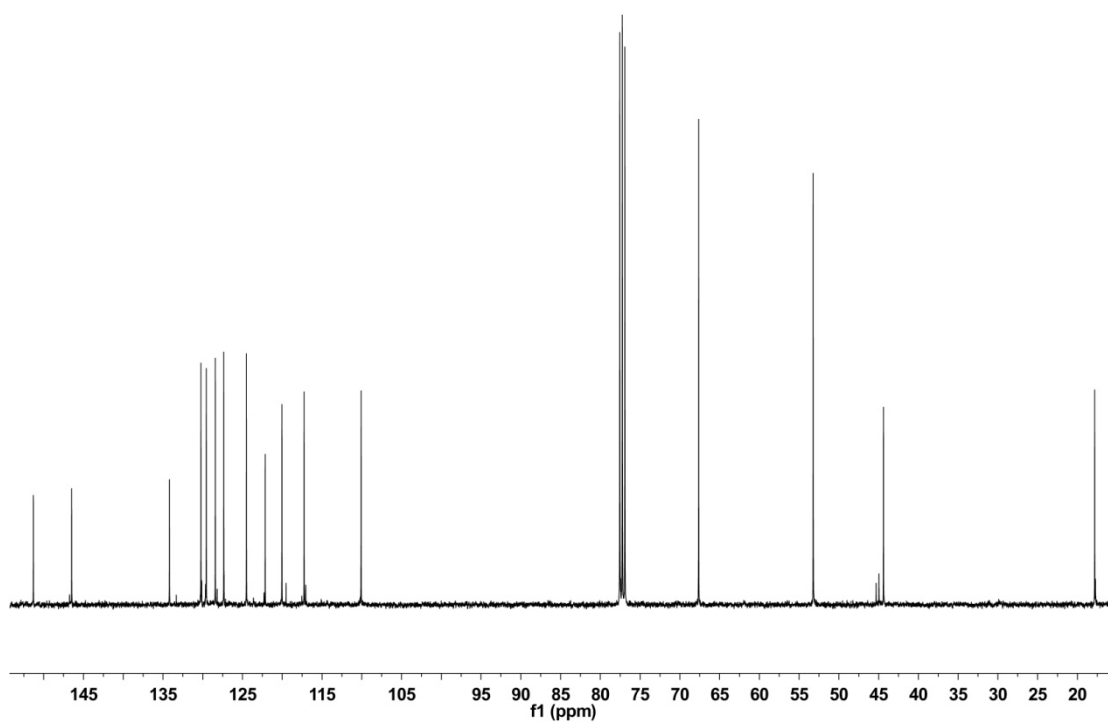

**Figure S14.** The  $^{13}\text{C}$  NMR spectrum of compound **1g** ( $\text{CDCl}_3$ , 100 MHz).

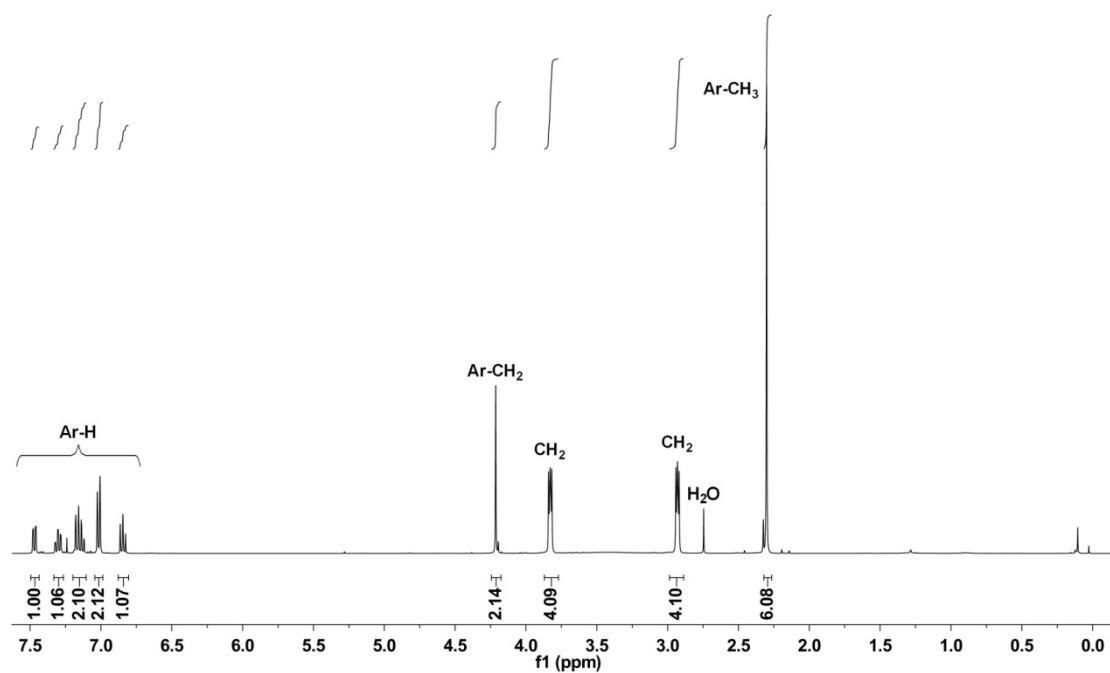

**Figure S15.** The  $^1\text{H}$  NMR spectrum of compound **1h** ( $\text{CDCl}_3$ , 400 MHz).

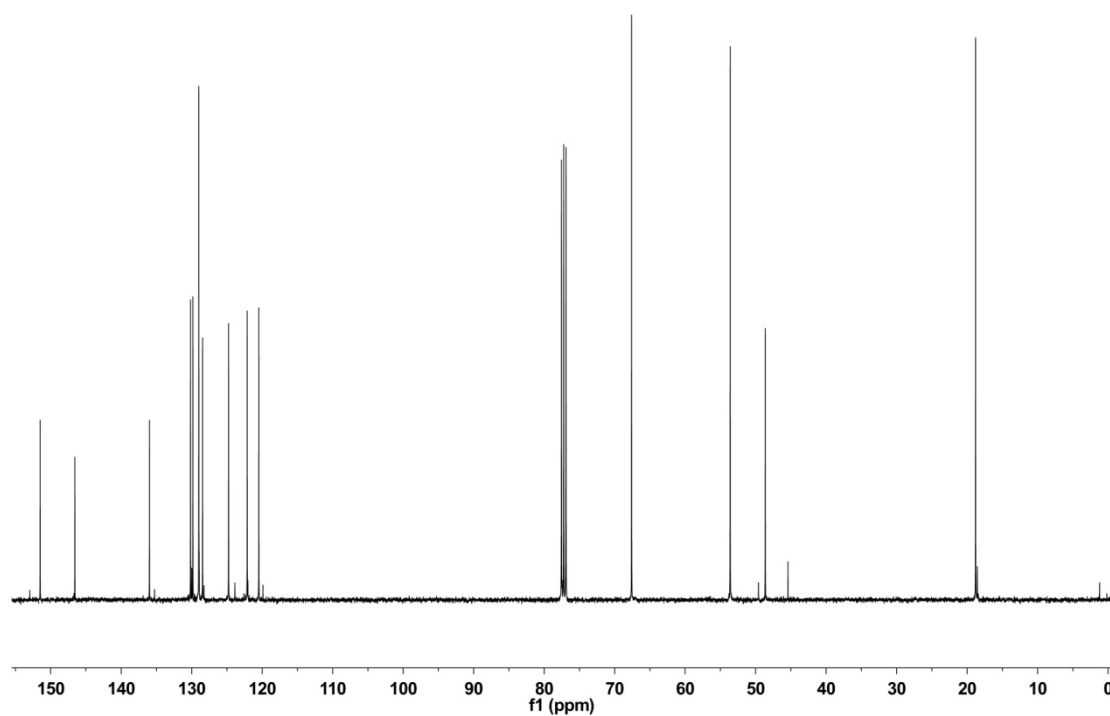

**Figure S16.** The  $^{13}\text{C}$  NMR spectrum of compound **1h** ( $\text{CDCl}_3$ , 100 MHz).

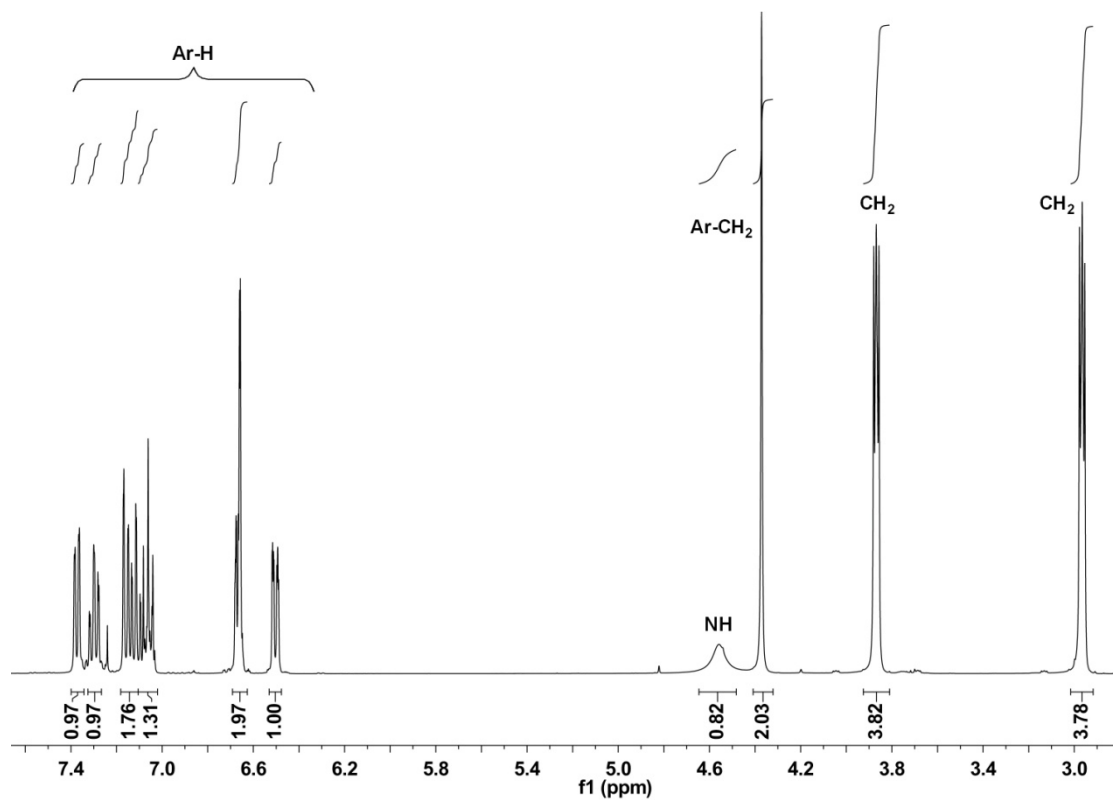

**Figure S17.** The  $^1\text{H}$  NMR spectrum of compound **1i** ( $\text{CDCl}_3$ , 400 MHz).

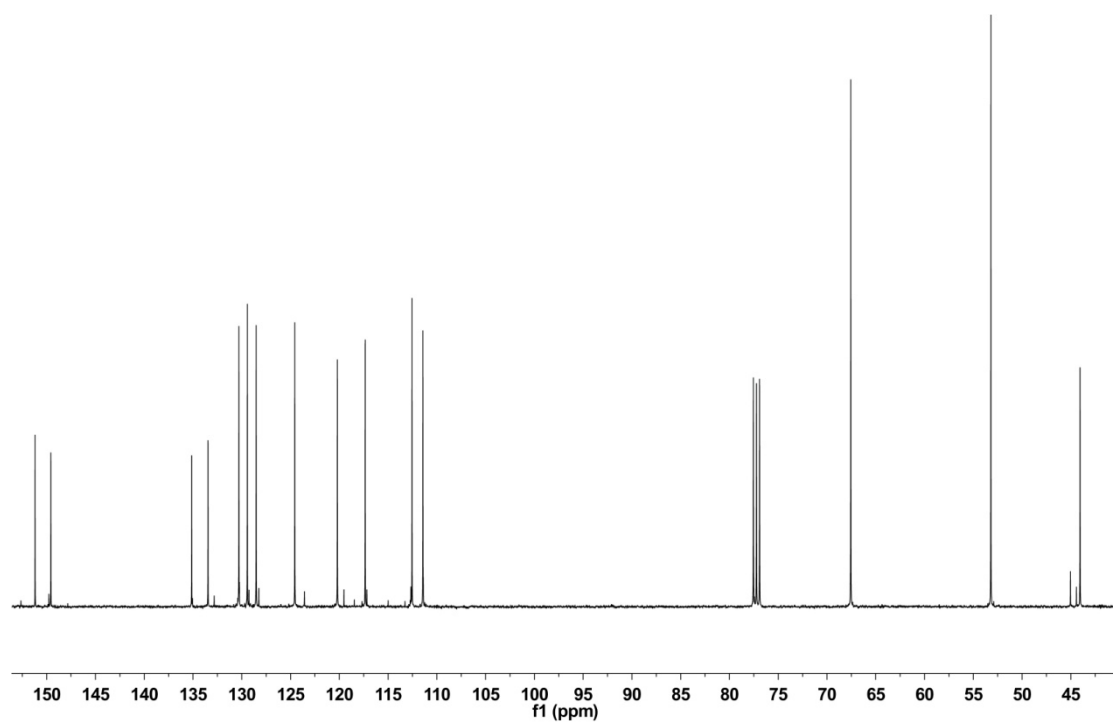

**Figure S18.** The  $^{13}\text{C}$  NMR spectrum of compound **1i** ( $\text{CDCl}_3$ , 100 MHz).

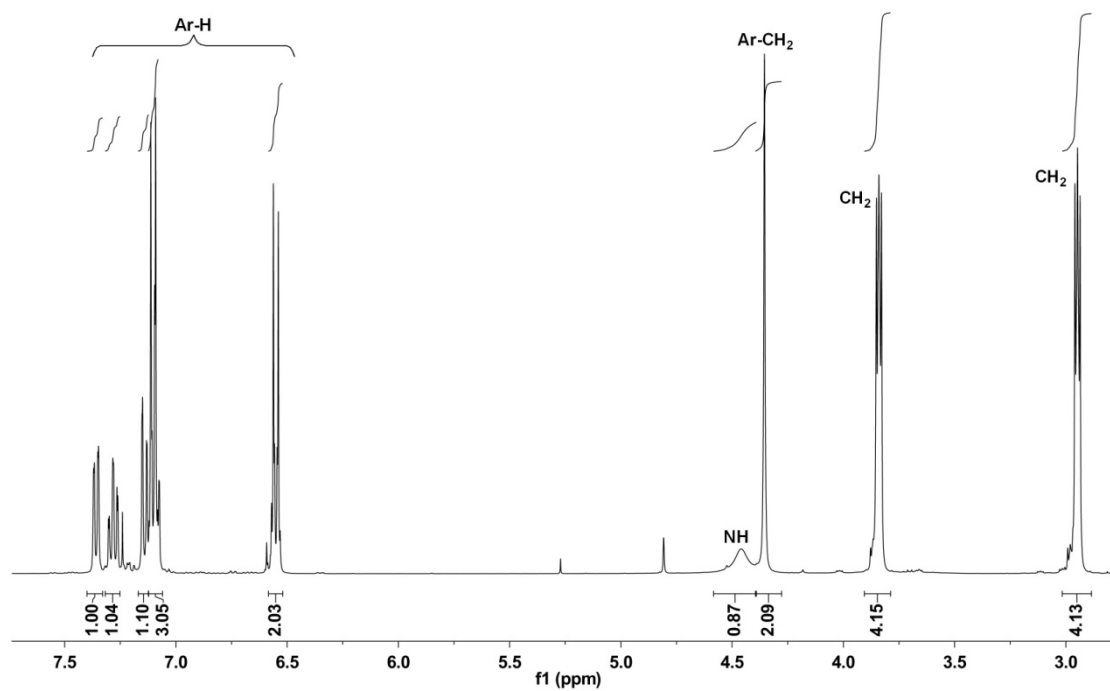

**Figure S19.** The  $^1\text{H}$  NMR spectrum of compound **1j** ( $\text{CDCl}_3$ , 400 MHz).

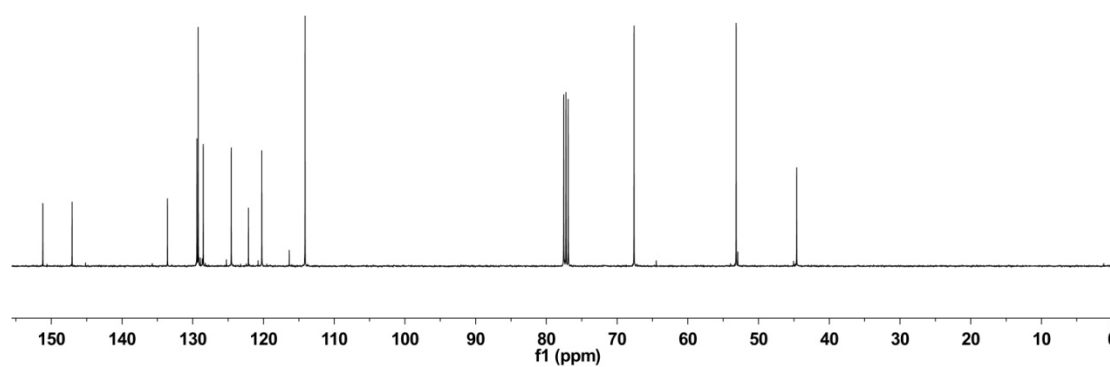

**Figure S20.** The  $^{13}\text{C}$  NMR spectrum of compound **1j** ( $\text{CDCl}_3$ , 100 MHz).

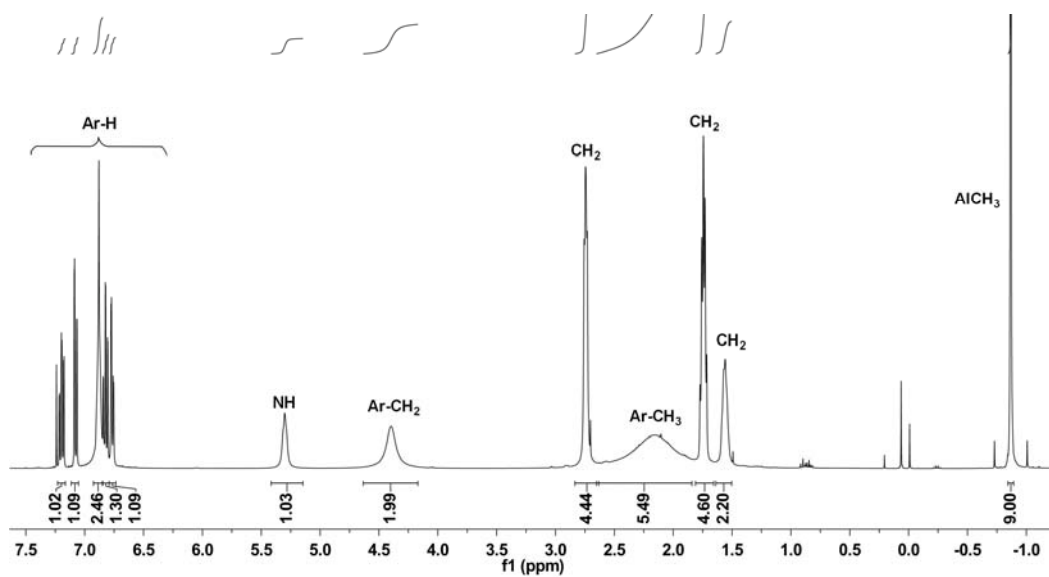

**Figure S21.** The  $^1\text{H}$  NMR spectrum of adduct **2b** ( $\text{CDCl}_3$ , 400 MHz).

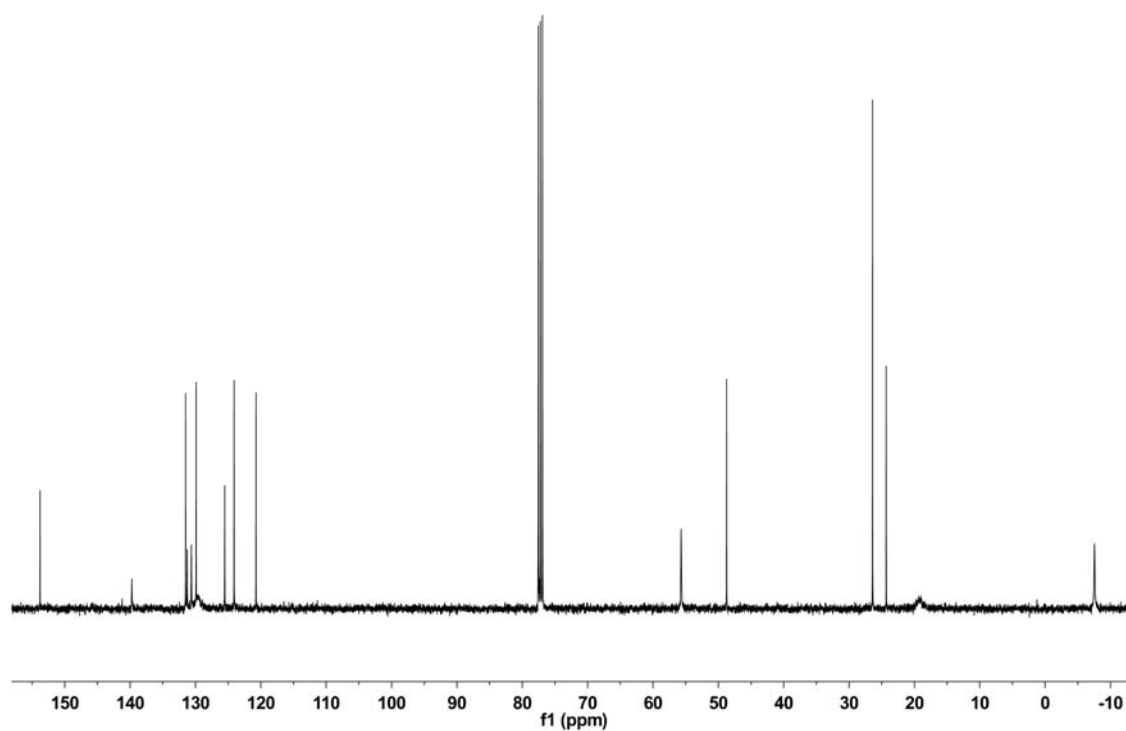

**Figure S22.** The  $^{13}\text{C}$  NMR spectrum of complex **2b** ( $\text{CDCl}_3$ , 100 MHz).

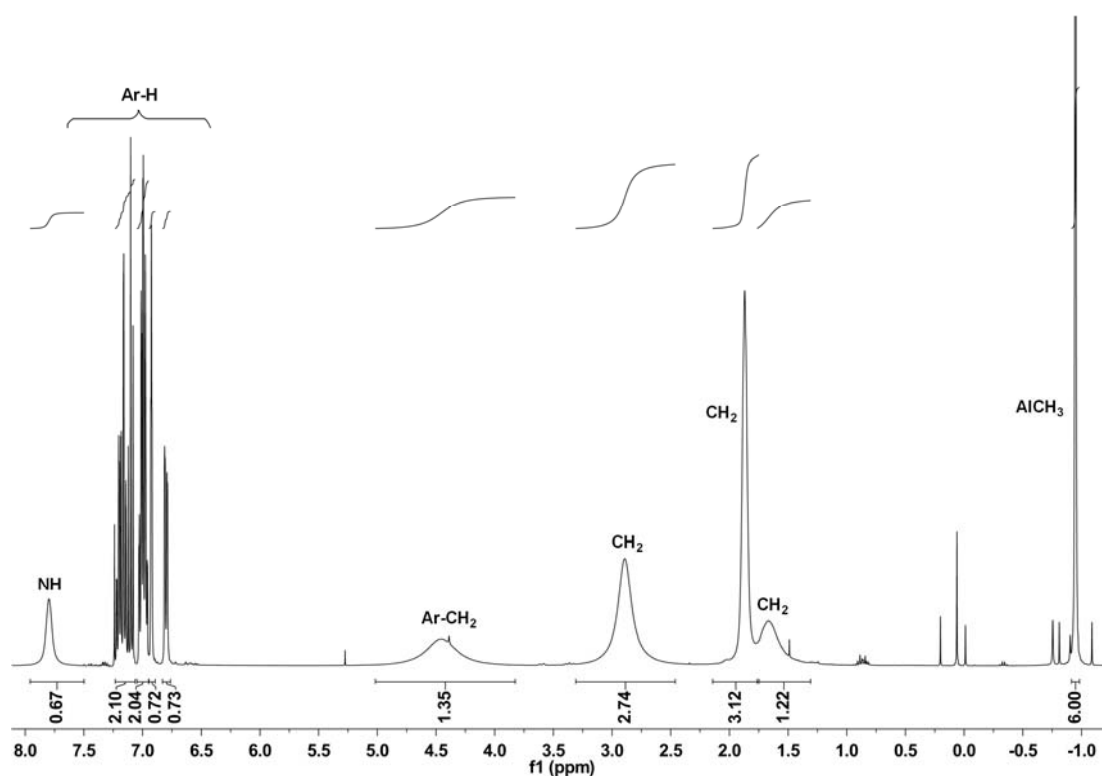

**Figure S23.** The  $^1\text{H}$  NMR spectrum of adduct **2d** ( $\text{CDCl}_3$ , 400 MHz).

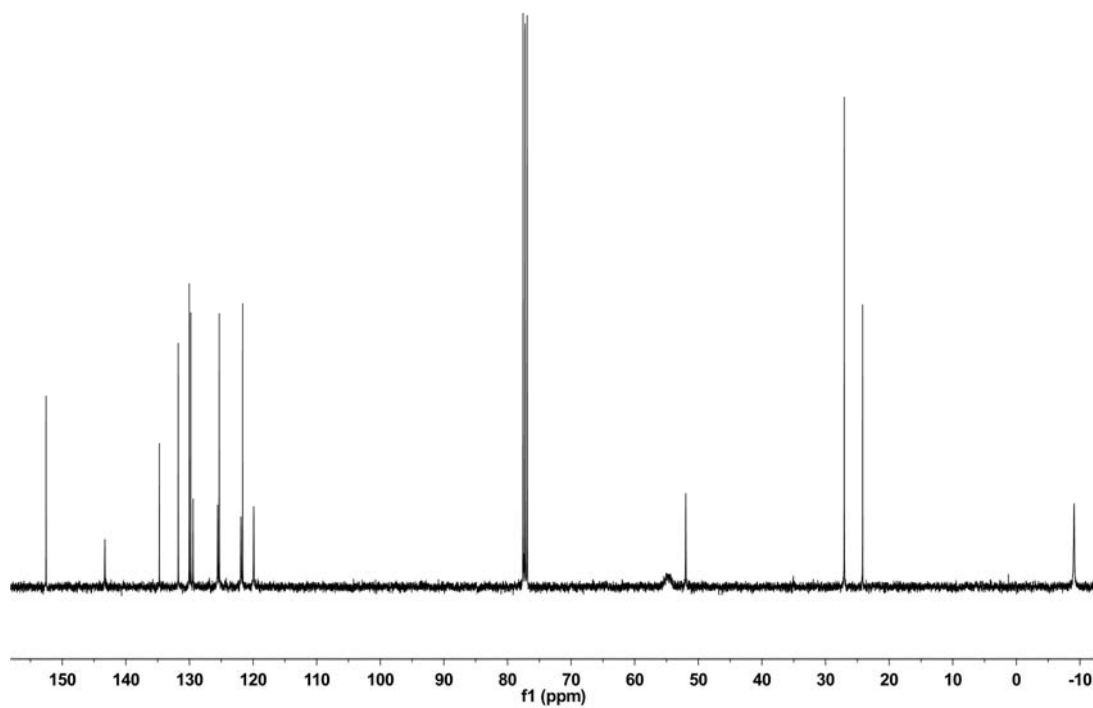

**Figure S24.** The  $^{13}\text{C}$  NMR spectrum of complex **2d** ( $\text{CDCl}_3$ , 100 MHz).

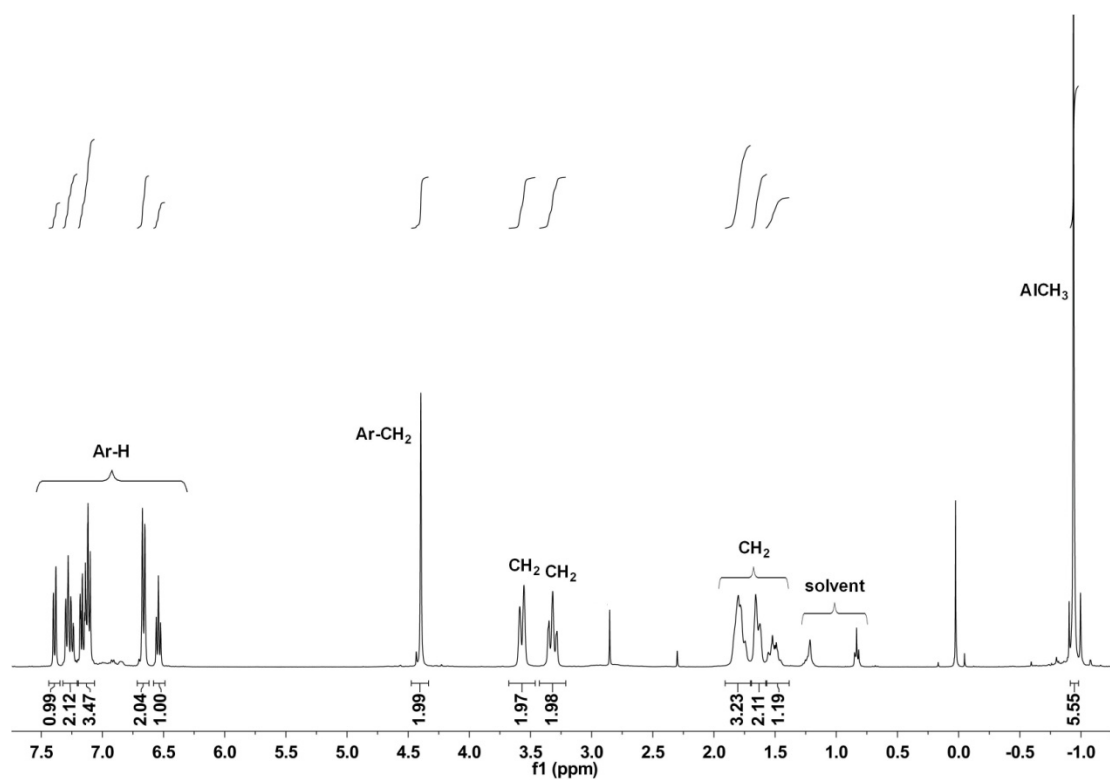

**Figure S25.** The  $^1\text{H}$  NMR spectrum of complex **3a** ( $\text{CDCl}_3$ , 400 MHz).

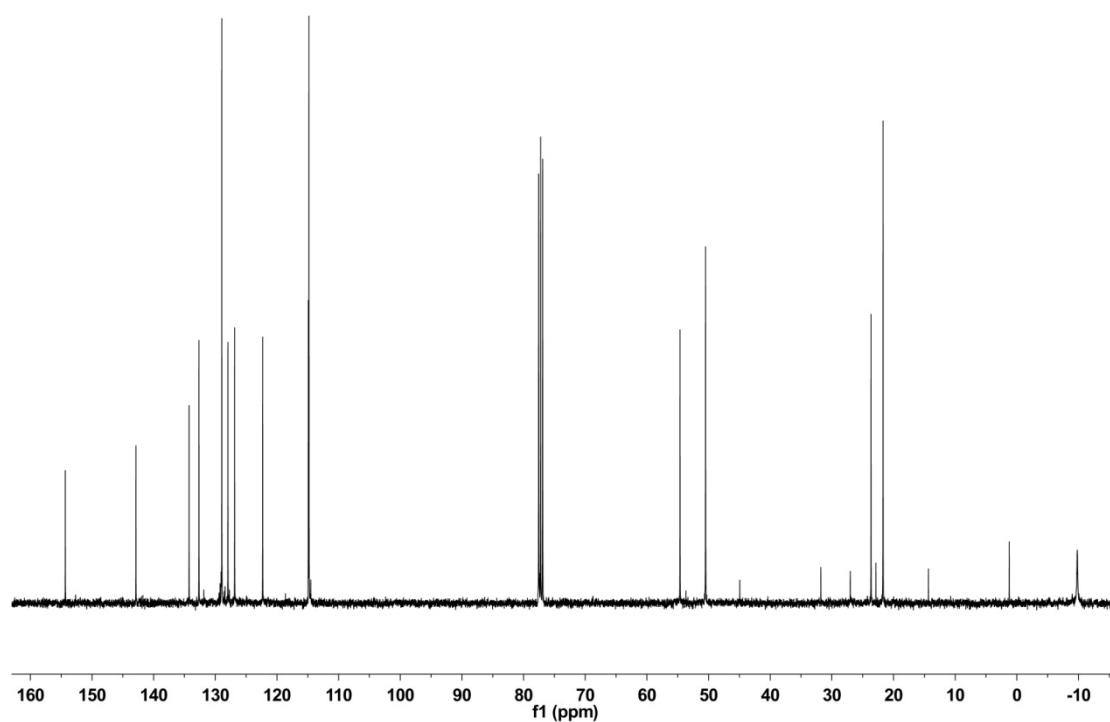

**Figure S26.** The  $^{13}\text{C}$  NMR spectrum of complex **3a** ( $\text{CDCl}_3$ , 100 MHz).

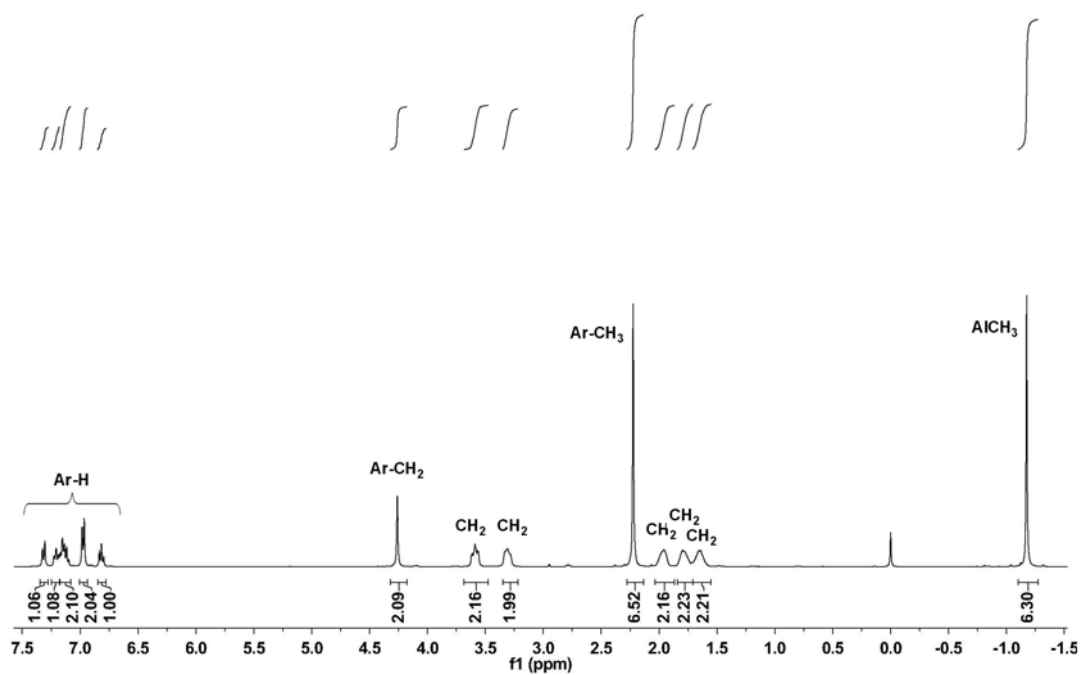

**Figure S27.** The  $^1\text{H}$  NMR spectrum of complex **3b** ( $\text{CDCl}_3$ , 400 MHz).

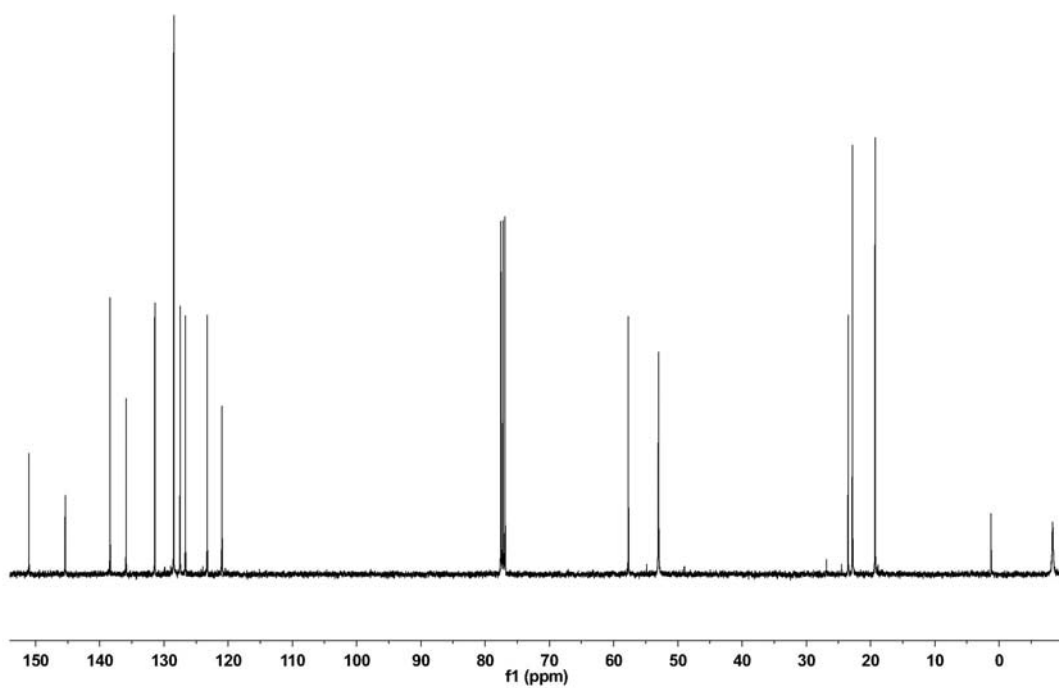

**Figure S28.** The  $^{13}\text{C}$  NMR spectrum of complex **3b** ( $\text{CDCl}_3$ , 100 MHz).



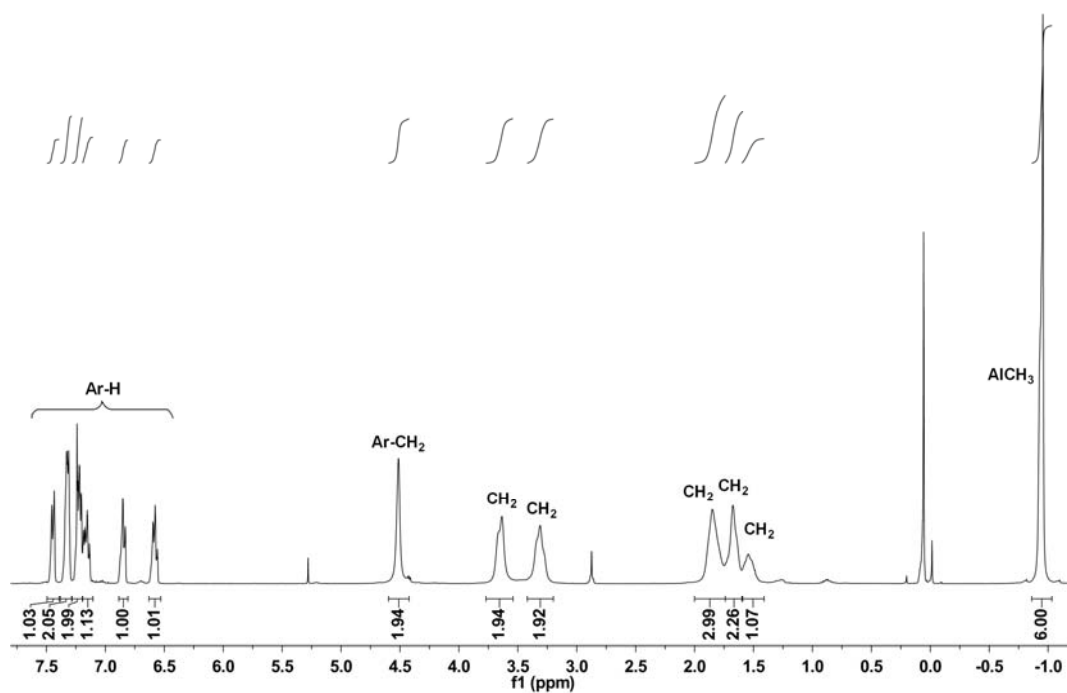

**Figure S29.** The  $^1\text{H}$  NMR spectrum of complex **3c** ( $\text{CDCl}_3$ , 400 MHz).

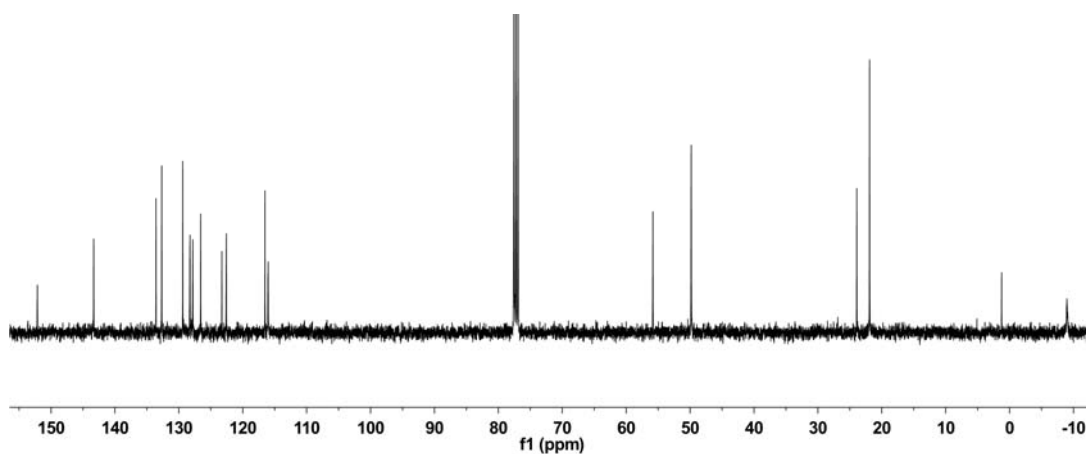

**Figure S30.** The  $^{13}\text{C}$  NMR spectrum of complex **3c** ( $\text{CDCl}_3$ , 100 MHz).

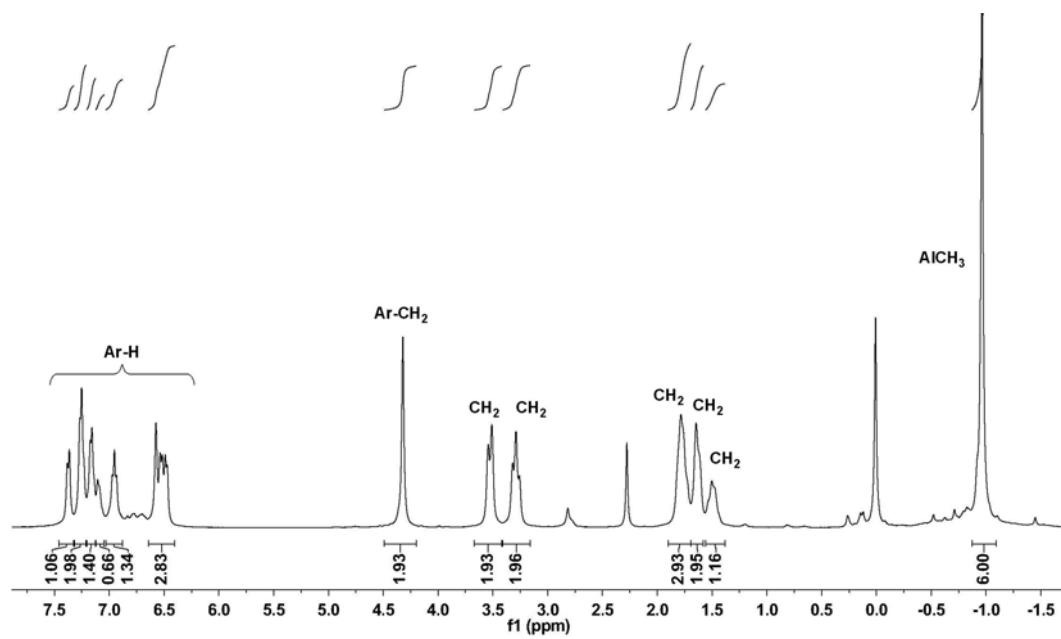

**Figure S31.** The  $^1\text{H}$  NMR spectrum of complex **3d** ( $\text{CDCl}_3$ , 400 MHz).

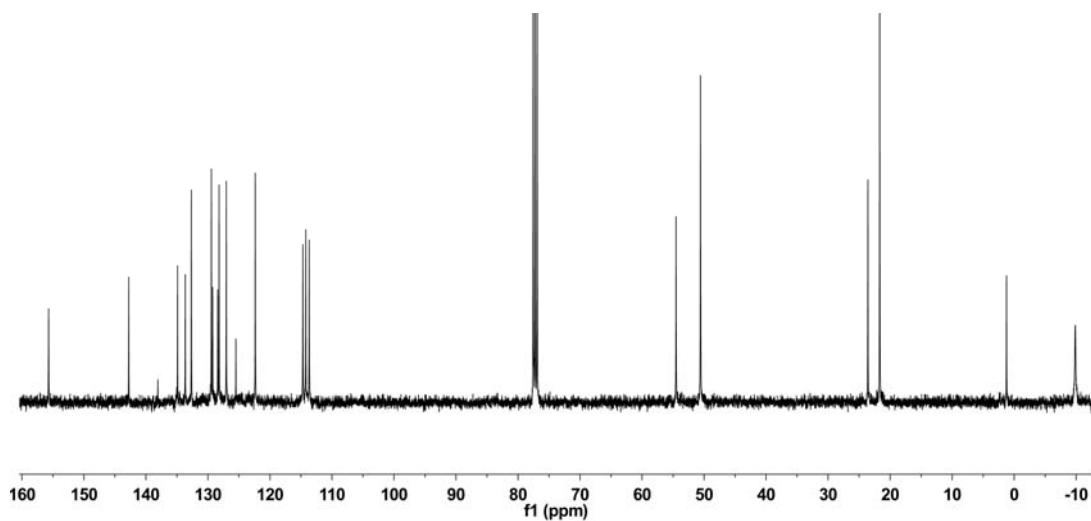

**Figure S32.** The  $^{13}\text{C}$  NMR spectrum of complex **3d** ( $\text{CDCl}_3$ , 100 MHz).

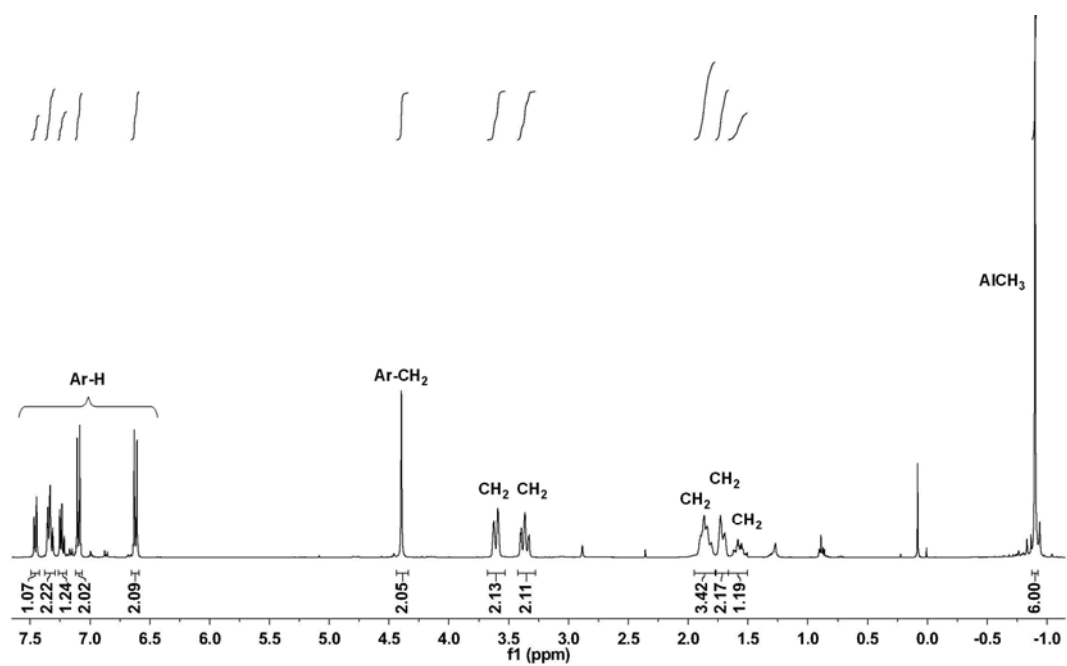

**Figure S33.** The  $^1\text{H}$  NMR spectrum of complex **3e** ( $\text{CDCl}_3$ , 400 MHz)

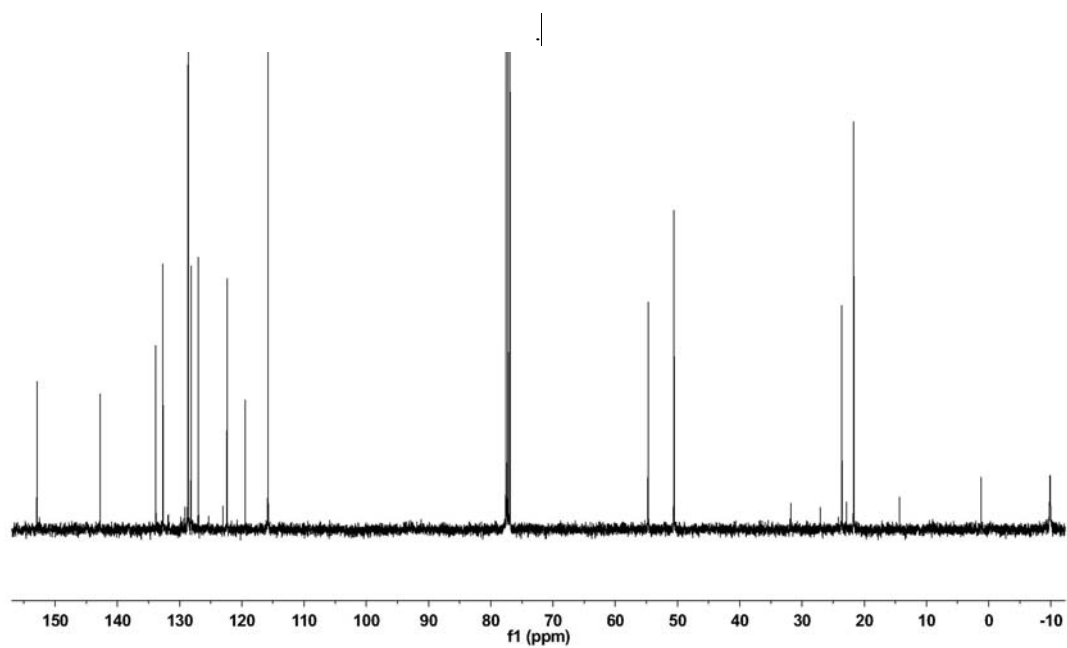

**Figure S34.** The  $^{13}\text{C}$  NMR spectrum of complex **3e** ( $\text{CDCl}_3$ , 100 MHz).

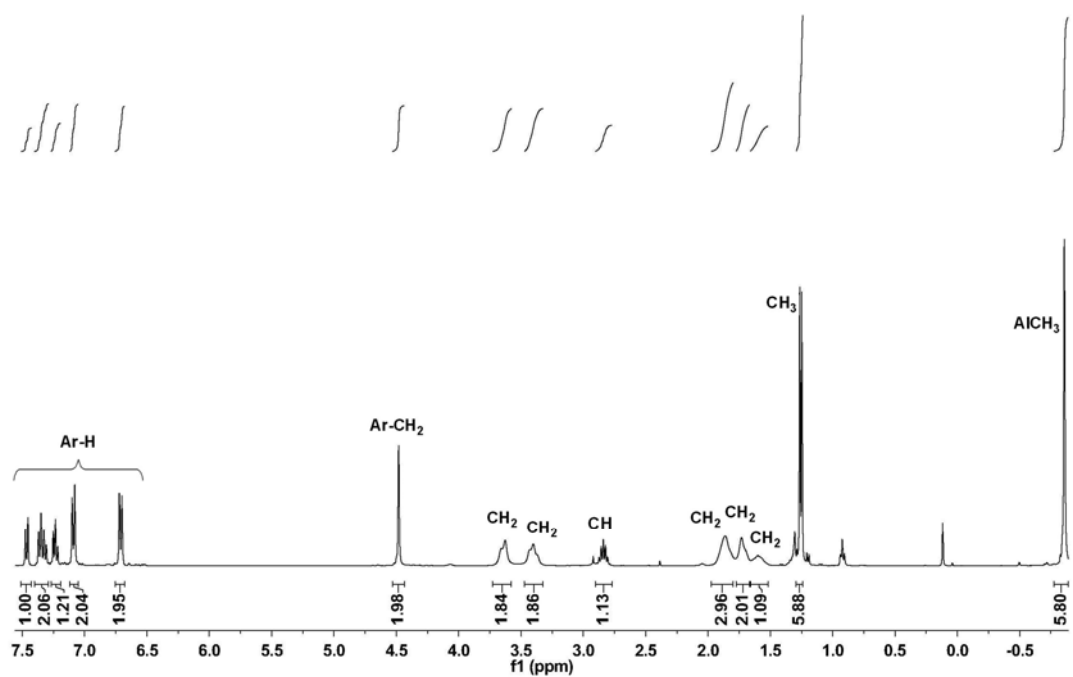

**Figure S35.** The  $^1\text{H}$  NMR spectrum of complex **3f** ( $\text{CDCl}_3$ , 400 MHz).

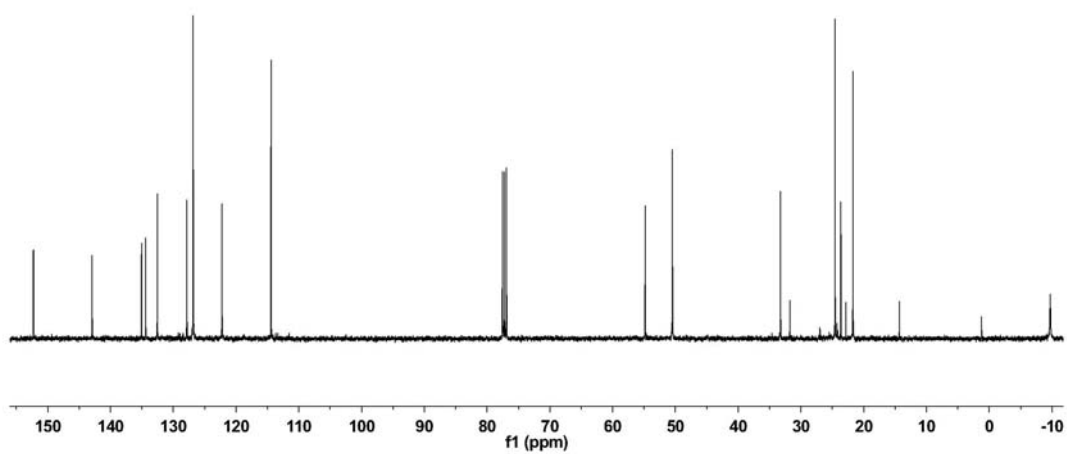

**Figure S36.** The  $^{13}\text{C}$  NMR spectrum of complex **3f** ( $\text{CDCl}_3$ , 100 MHz).

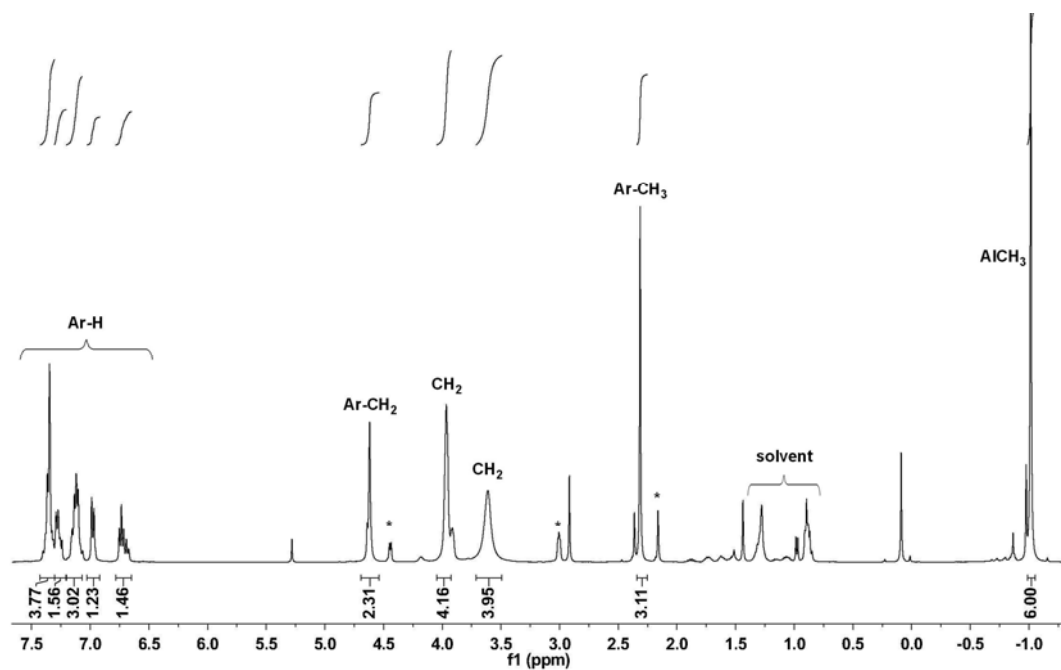

**Figure S37.**  $^1\text{H}$  NMR spectrum of complex **3g** ( $\text{CDCl}_3$ , 400 MHz). \* The free ligand formed during the course of measurement.

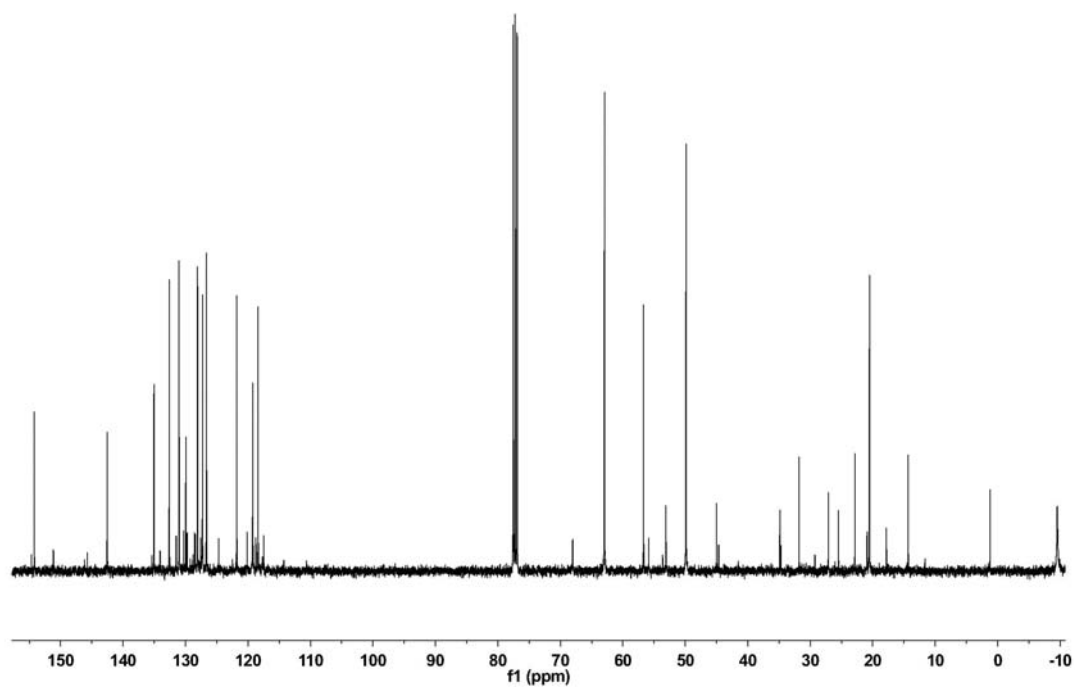

**Figure S38.** The  $^{13}\text{C}$  NMR spectrum of complex **3g** ( $\text{CDCl}_3$ , 100 MHz).

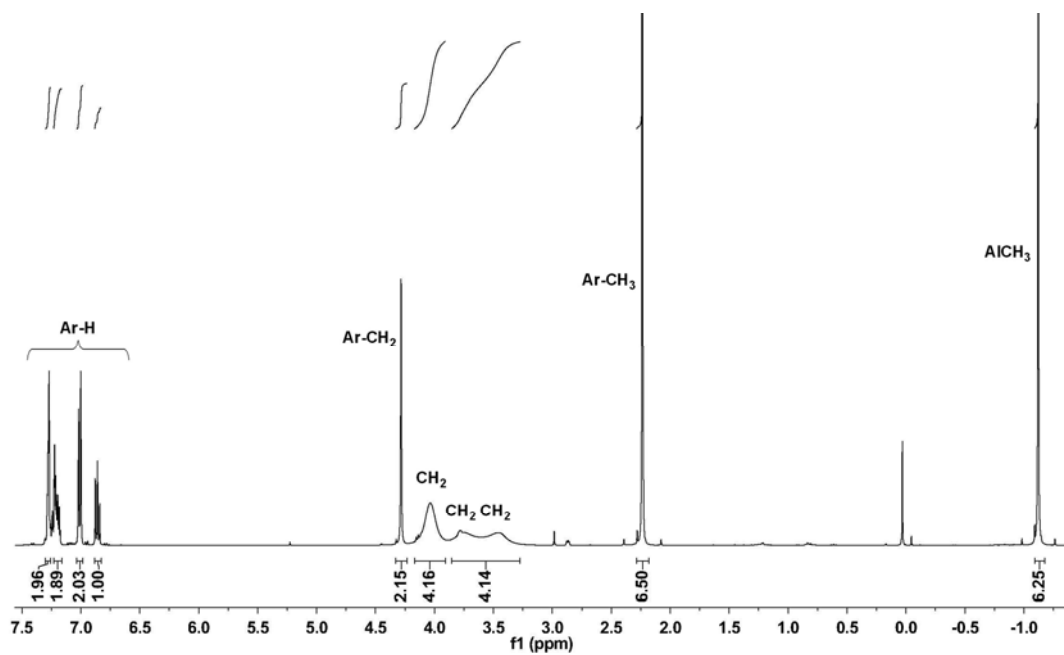

**Figure S39.** The  $^1\text{H}$  NMR spectrum of complex **3h** ( $\text{CDCl}_3$ , 400 MHz).

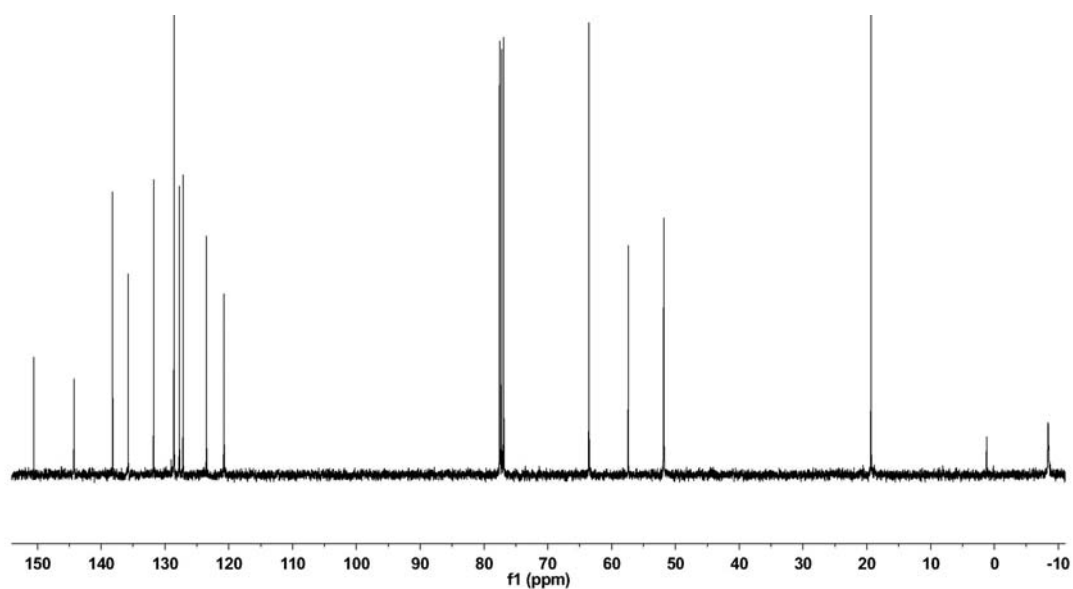

**Figure S40.** The  $^{13}\text{C}$  NMR spectrum of complex **3h** ( $\text{CDCl}_3$ , 100 MHz).

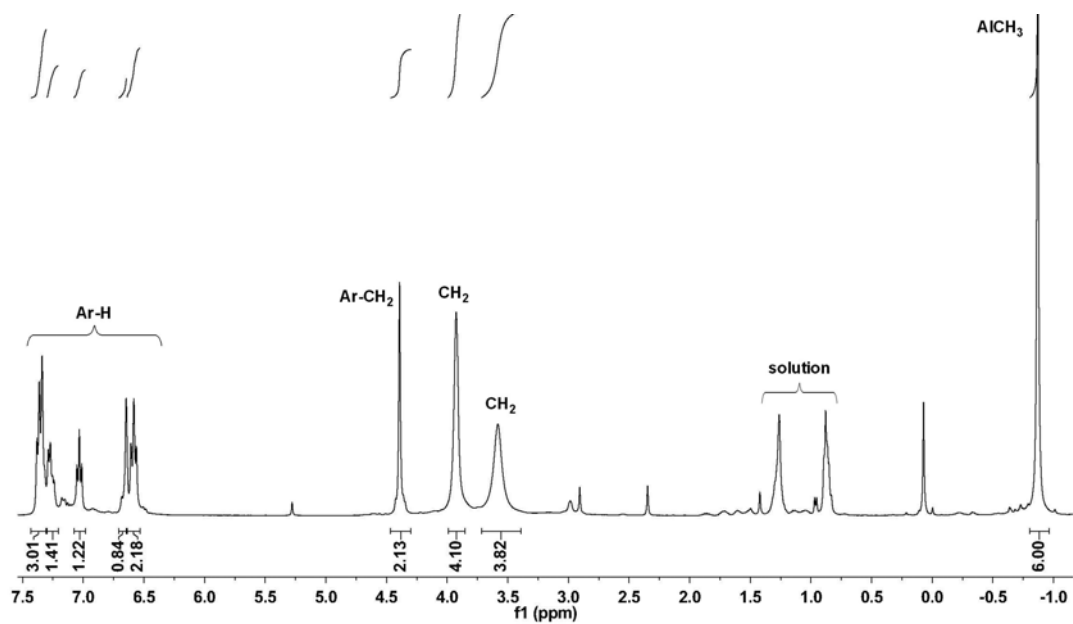

**Figure S41.** The  $^1\text{H}$  NMR spectrum of complex **3i** ( $\text{CDCl}_3$ , 400 MHz).

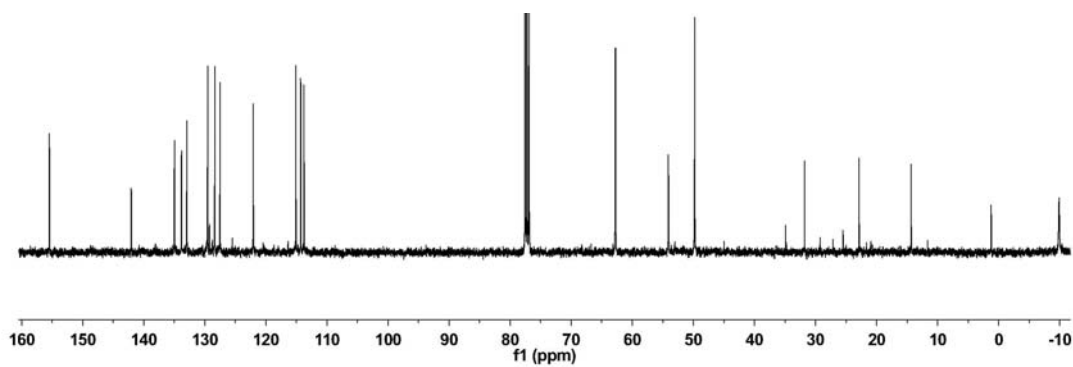

**Figure S42.** The  $^{13}\text{C}$  NMR spectrum of complex **3i** ( $\text{CDCl}_3$ , 100 MHz).

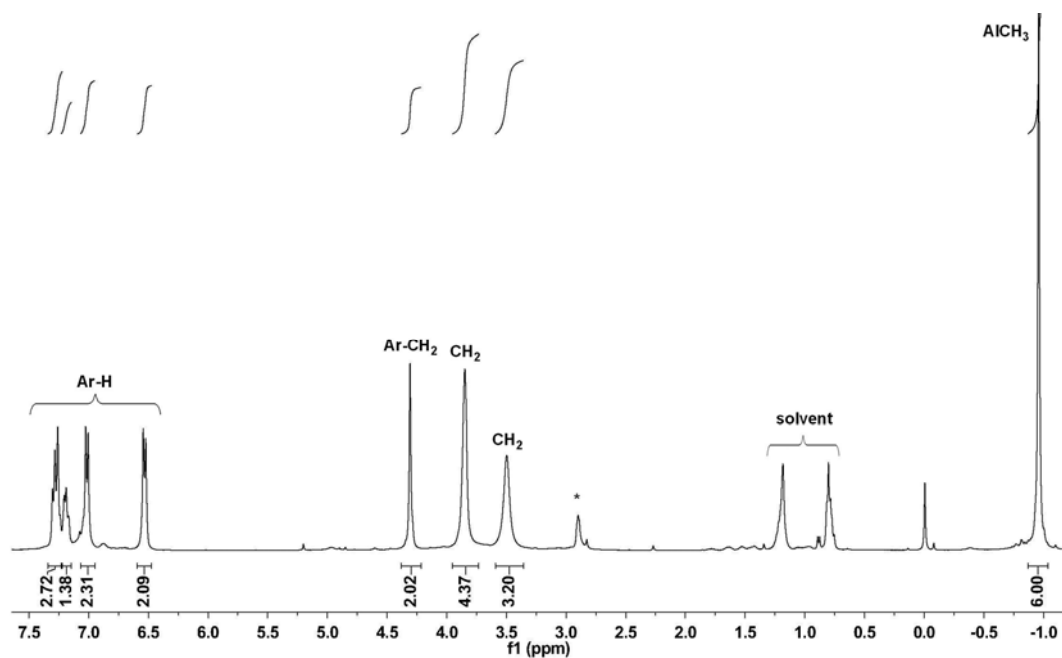

**Figure S43.** The  $^1\text{H}$  NMR spectrum of complex **3j** ( $\text{CDCl}_3$ , 400 MHz). \* The free ligand formed during the course of measurement.

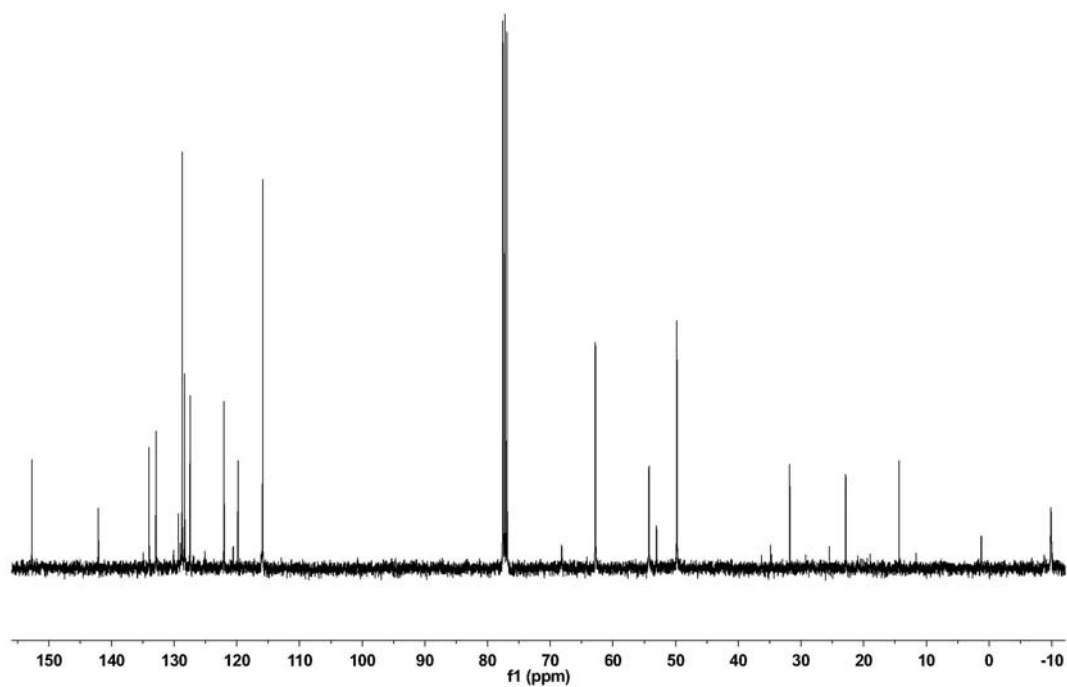

**Figure S44.** The  $^{13}\text{C}$  NMR spectrum of complex **3j** ( $\text{CDCl}_3$ , 100 MHz).



### 3. Representative GPC traces of the obtained PLA samples

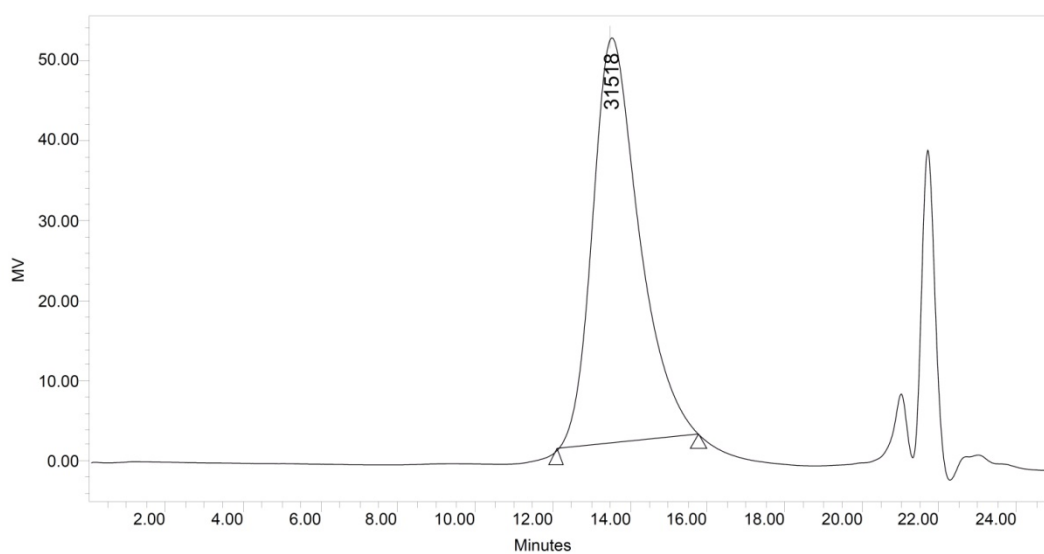

**Figure S45.** GPC trace of isolated PLA prepared via ROP of *rac*-lactide by **3f**.  
Conditions: 100 equiv. of *rac*-lactide, 65 °C, toluene, 91% conversion, 18 h.

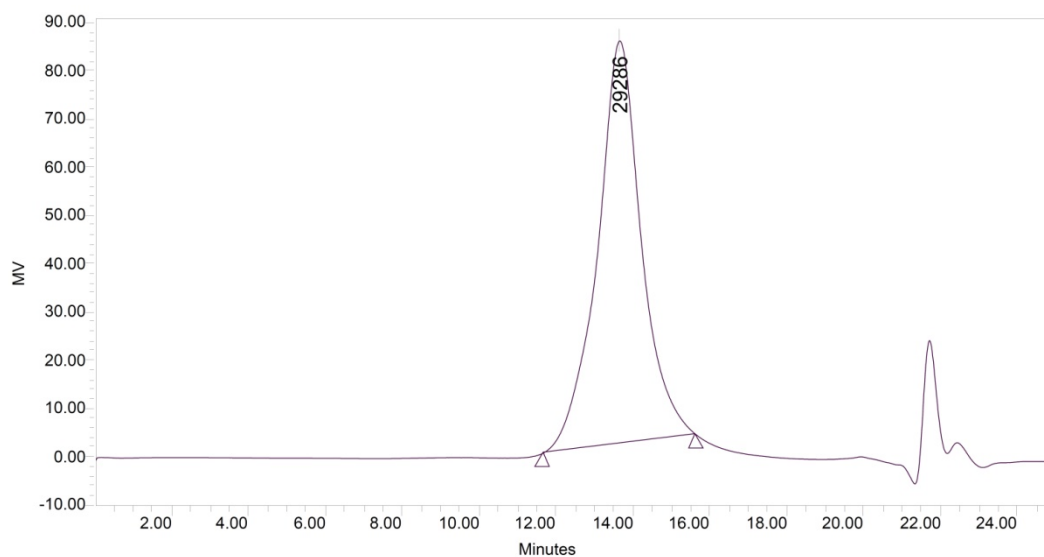

**Figure S46.** GPC trace of isolated PLA prepared via ROP of *rac*-lactide by **3c**.  
Conditions: 100 equiv. of *rac*-lactide, 65 °C, toluene, 92% conversion, 20 h.

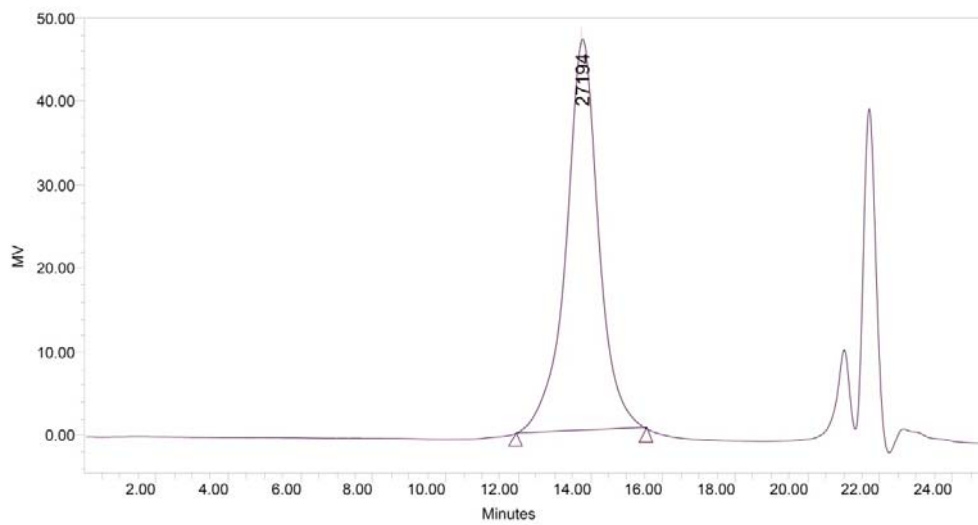

**Figure S47.** GPC trace of isolated PLA prepared via ROP of *rac*-lactide by **3e**.  
Conditions: 100 equiv. of *rac*-lactide, 65 °C, toluene, 88% conversion, 15 h.

#### 4. NMR studies of *rac*-LA oligomerization initiated by complex **3f**

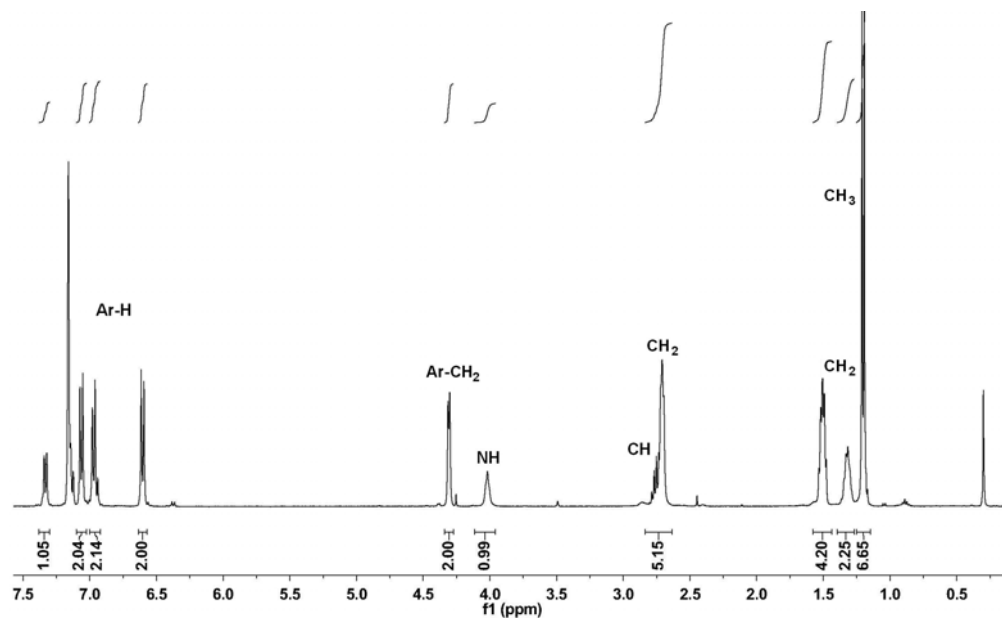

Figure S48. The  $^1\text{H}$  NMR spectrum of the ligand **1f** in  $\text{C}_6\text{D}_6$  (400 MHz).

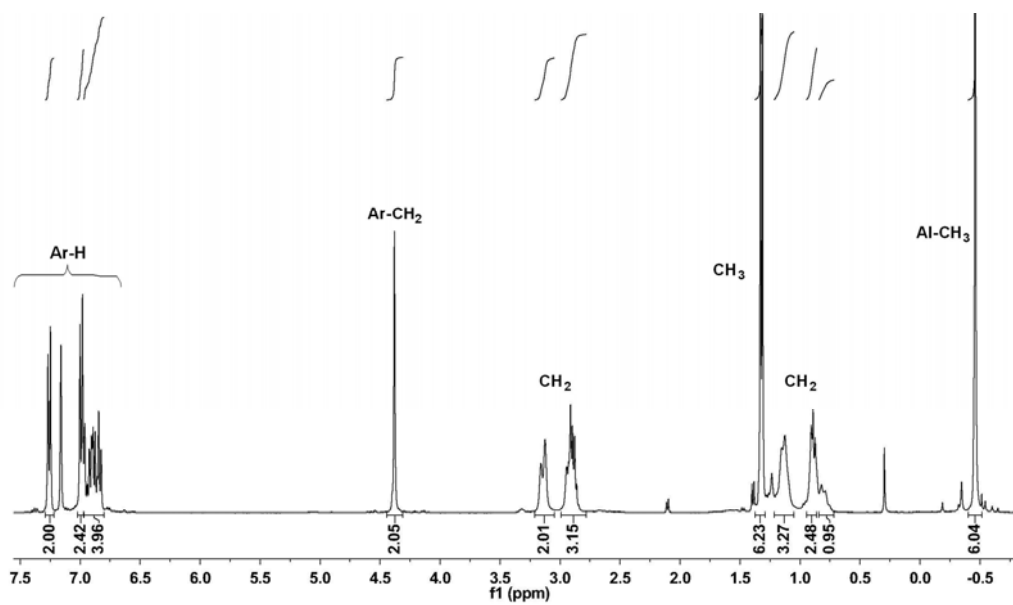

Figure S49. The  $^1\text{H}$  NMR spectrum of the complex **3f** in  $\text{C}_6\text{D}_6$  (400 MHz).

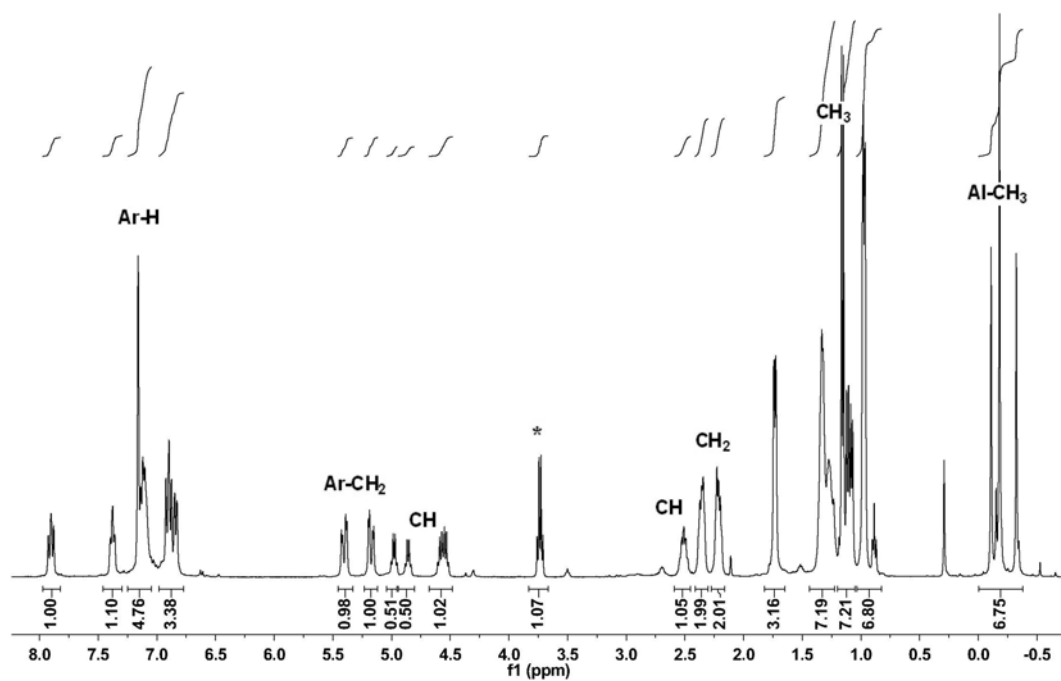

**Figure S50.** The  $^1\text{H}$  NMR spectrum of the mixture of the complex **3f** and *rac*-LA ( $[\mathbf{3f}]: [\textit{rac}\text{-LA}] = 1 : 1.5$ ) at room temperature ( $\text{C}_6\text{D}_6$ , 400 MHz; \* free lactide monomer).

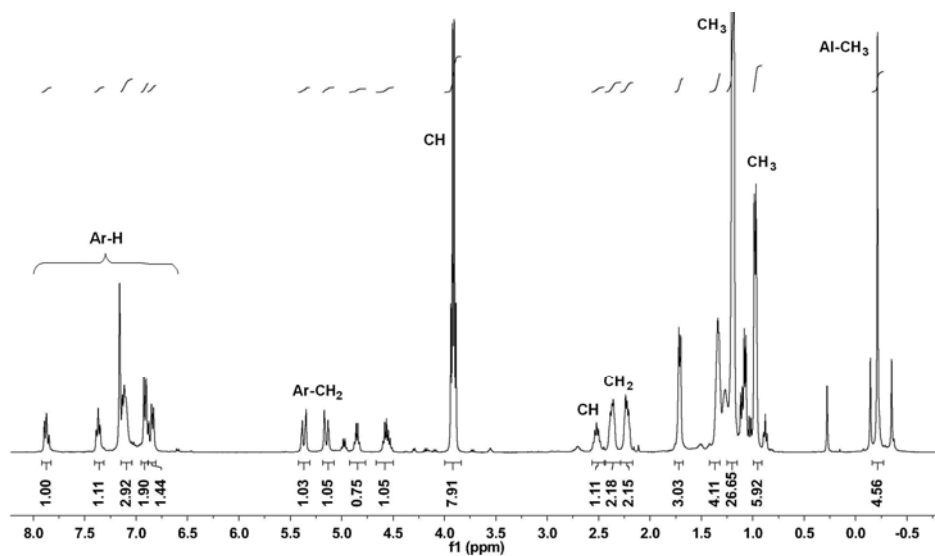

**Figure S51.** The  $^1\text{H}$  NMR spectrum of the mixture of the complex **3f** and *rac*-LA ( $[\mathbf{3f}]: [\textit{rac}\text{-LA}] = 1 : 1.5$ ) at room temperature ( $\text{C}_6\text{D}_6$ , 400 MHz).

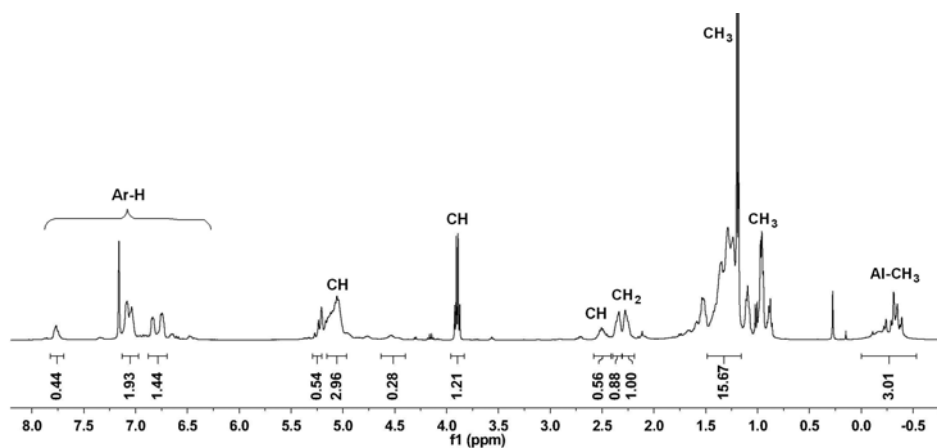

**Figure S52.** The  $^1\text{H}$  NMR spectrum of the mixture of the complex **3f** and *rac*-LA ( $[\mathbf{3f}]: [\textit{rac}\text{-LA}] = 1:5$ ) at  $65^\circ\text{C}$  after 50 min ( $\text{C}_6\text{D}_6$ , 400 MHz).

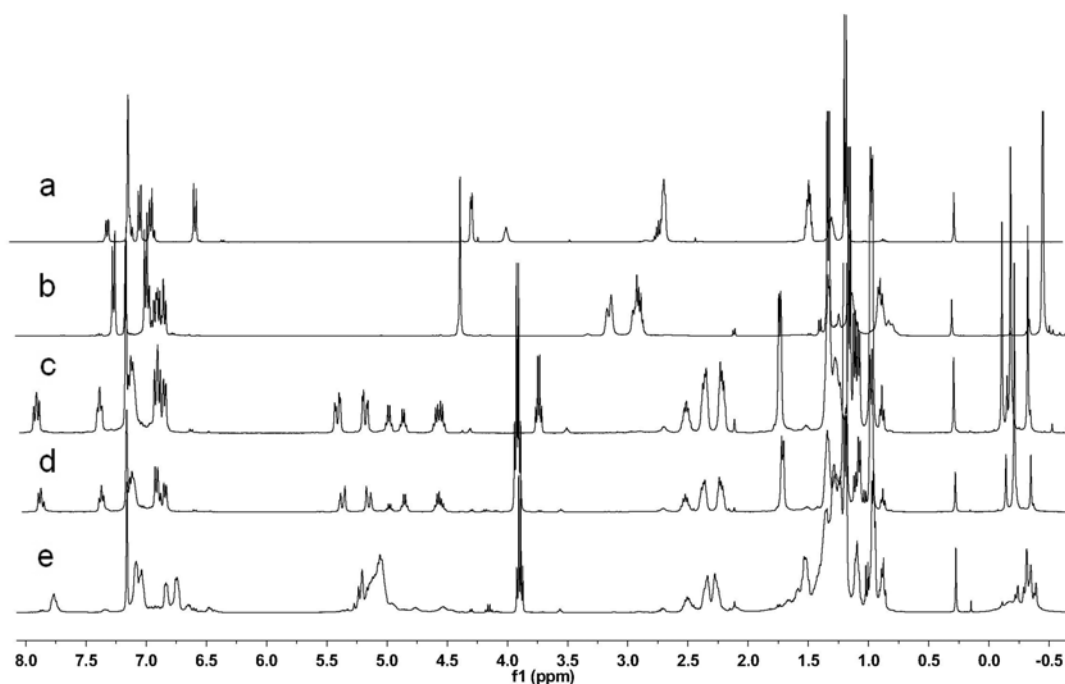

**Figure S53.** The comparison of  $^1\text{H}$  NMR spectra of (a) ligand **1f**; (b) complex **3f**; (c) the reaction mixture of complex **3f** and *rac*-LA ( $[\mathbf{3f}]: [\textit{rac}\text{-LA}] = 1:1.5$ ) at room temperature; (d) the reaction mixture of complex **3f** and *rac*-LA ( $[\mathbf{3f}]: [\textit{rac}\text{-LA}] = 1:5$ ) at room temperature; (e) the reaction mixture of the complex **3f** and *rac*-LA ( $[\mathbf{3f}]: [\textit{rac}\text{-LA}] = 1:5$ ) at  $65^\circ\text{C}$  after 50 min ( $\text{C}_6\text{D}_6$ , 400 MHz).
